## **Antigen experience relaxes the organisational structure of the T cell receptor repertoire**

**Michal Mark<sup>1</sup>, Shlomit Reich-Zeliger<sup>1</sup>, Erez Greenstein<sup>1</sup>, Dan Reshef<sup>1</sup>, Asaf Madi<sup>2</sup>, Benny Chain<sup>+</sup>  
<sup>3</sup>and Nir Friedman<sup>+1</sup>**

<sup>1</sup> Department of Immunology, Weizmann Institute of Science, Rehovot, Israel

<sup>2</sup> Department of Pathology, Tel-Aviv University, Tel-Aviv, Israel

<sup>3</sup> Division of Infection and Immunity, and Department of Computer Science, UCL, London

<sup>+</sup> These authors contributed equally

\* Corresponding authors: [michal.mark@weizmann.ac.il](mailto:michal.mark@weizmann.ac.il), [b.chain@ucl.ac.uk](mailto:b.chain@ucl.ac.uk)

## List of Abbreviations

TCR: T cell receptor

TCR-seq: High-throughput sequencing of TCR.

BM: Bone-marrow

SP: Spleen

MHC: Major histocompatibility complex

CDR3: Complementarity determining region three

CDR3NT/CDR3AA: Nucleotide and amino acid sequences of the CDR3

UMI: Unique molecular identifier

CM: Central memory T cells

N: Naïve T cells

Treg: Regulatory T cells

RT: Reverse transcription

cDNA: Complementary DNA

V, D and J: Variable (V), diversity (D) and joining (J) TCR gene segments

CDR3ntVJ: CDR3NT sequences with V and J gene segments

LCMV: Lymphocytic choriomeningitis virus

## Abstract

The creation and evolution of the T cell receptor repertoire within an individual combines stochastic and deterministic processes. We systematically examine the structure of the repertoire in different T cell subsets in young, adult and LCMV infected mice, from the perspective of variable gene usage, nucleotide sequences and amino acid motifs. Young individuals share a high level of organization, especially in the frequency distribution of variable genes and amino acid motifs. In adult mice, this structure relaxes and is replaced by idiotypic evolution of the effector and regulatory repertoire. The repertoire of CD4+ regulatory T cells was more similar to naïve cells in young mice, but became more similar to effectors with age. Finally, we observed a dramatic restructuring of the repertoire following infection with LCMV. We hypothesize that the stochastic process of recombination and thymic selection initially impose a strong structure to the repertoire, which gradually relaxes following asynchronous responses to different antigens during life.

## 1 Introduction

2 The ability to sustain effective T cell immunity relies on a diverse  $\alpha\beta$  heterodimeric T cell receptor (TCR) repertoire  
3 generated by the stochastic variable, diversity and joining (VDJ) recombination mechanism(Kohler et al., 2005). This  
4 diverse repertoire is shaped over time by recombination biases (Qi et al., 2014)(Snook et al., 2018), thymic and extra-  
5 thymic selection(Kohler et al., 2005) (Qi et al., 2014) (Kavazović et al., 2018) , selective migration and antigen-driven  
6 clonal expansion. The encounter with cognate peptide-MHC complex (pMHC) also drives the differentiation of the T cell.  
7 For example, the strength of TCR stimulation can skew differentiation of memory versus effector T cells(Snook et al.,  
8 2018) (Kavazović et al., 2018) and CD4+ regulatory (Treg) versus effector/memory CD4+ cells(Lee et al., 2012) (Stritesky  
9 et al., 2012) linking TCR specificity to phenotype and function. The aim of this study is to document the influence of  
10 these diverse processes on the underlying structure and organization of the TCR repertoire, determined at a global  
11 level.

12 Several previous studies have used deep sequencing to explore the TCR repertoire in different T cell subsets. For  
13 example, significant changes can be found between the repertoires of CD4+ and CD8+ cells, presumably reflecting  
14 selection by different classes of MHC peptide complexes(Li et al., 2016)(Gulwani-Akolkar et al., 1995). Similarly, the  
15 repertoire differences found between CD4+ Treg and conventional CD4+ cells(Pacholczyk et al., 2006)(Wang et al.,  
16 2010) are presumed to be shaped by their recognition of self or foreign peptides. However, the processes driving  
17 repertoire diversification are probabilistic, rather than deterministic. As a result, identical TCR sequences can be found  
18 in multiple subsets, and can even be shared between CD4+ and CD8+ populations(Wang et al., 2010).

19 In young individuals, the majority of the T cell compartment is made up of naïve cells, and the repertoire is presumably  
20 shaped largely by stochastic recombination and thymic selection. However, as individuals age their immune system  
21 responds to an increasing number of foreign antigens, derived principally from microbial, allergen or altered-self (e.g.  
22 neoantigen) exposure. This drives a relative shift towards the memory/effector phenotype(Arnold et al., 2011),  
23 accompanied by increased clonal expansion. Interestingly, exposure to antigen in different individuals can drive both  
24 convergent and divergent repertoire evolution (Heather et al., 2016)(Pogorelyy et al., 2018). At the repertoire level  
25 clonal expansion results in a gradual decrease in overall repertoire diversity(Jörg J. et al., 2015) (Britanova et al., 2014) .  
26 The CD4+ T cell repertoire diversity is more preserved with age in the bone marrow compared to the spleen(Shifrut et  
27 al., 2013), which may relate to the role of the bone marrow microenvironment in preservation of memory T cells (Di

28 Rosa and Pabst, 2005)(Baliu-Piqué et al., 2018). The Treg repertoire also changes with age, as production of thymic  
29 "natural " Treg drops significantly, and are replaced by a high proportion of Tregs with active effector/memory  
30 phenotype(Smigiel et al., 2014)(Thiault et al., 2015).

31 In this study, we combine multi-parameter fluorescence-activated cell sorting with high-throughput-next generation  
32 sequencing to undertake a comprehensive high resolution analysis of the  $\alpha\beta$  TCR repertoire of various T cell  
33 compartments in young and adult mice, comparing CD4+ and CD8+ T cells of naïve, central memory, effector and Tregs,  
34 from the spleen and bone marrow. We illustrate the impact of strong antigen exposure on the global properties of the  
35 repertoire by analyzing the changes that follow infection with lymphocytic choriomeningitis virus. We quantify the global  
36 parameters of the repertoire at different levels of dimensionality, spanning variable gene frequencies, amino acid motif  
37 frequencies and at the level of individual nucleotide sequences. We explore different ways to visualize the structure and  
38 order which underlies the superficially diverse and chaotic collections of different DNA and protein sequences which  
39 constitute the T cell repertoire. Finally, we interpret our observations from the perspective of the probabilistic, but not  
40 chaotic processes which determine the development and evolution of the TCR repertoire. We hypothesize that these  
41 processes operating on millions of T cells impose a strong overall structure to the repertoire. This structure relaxes as a  
42 result of divergent responses to antigen exposure in different individuals.

## 43 Results

### 44 A quantitative description of the TCR repertoire.

45 We collected CD4+ and CD8+ T cells of naïve, central memory, effector and Tregs, from the spleen and bone marrow of  
46 12 and 52 week old mice (summarized in Fig 1A). Representative flow cytometry plots showing the phenotypic markers,  
47 the gating strategy and relative purity of the populations obtained are shown in supplementary (SI Fig 1A-B). We  
48 appreciate that our antibody panel does not fully capture the complexity of the T cell compartment, and that more  
49 extensive panels would be required to fully differentiate between all the known sub-compartments. However, for the  
50 purpose of this high level analysis, we simplify the nomenclature, and refer to the sorted populations as naïve, Treg,  
51 central memory and effector. After RNA extraction, we amplified the TCR repertoire using a previously published  
52 experimental pipeline which incorporates unique molecular identifiers (UMI) for each cDNA molecule to correct for PCR  
53 bias and sequencing error, allowing a robust and quantitative annotation of each sequence in terms of V gene, J gene,  
54 CDR3 sequence and frequency (Oakes et al., 2017)(Uddin et al., 2019).

55 The numbers of cells and the number of TCR mRNAs (captured by the total UMI count) which were recovered varied  
56 widely between compartments and age groups. For example, both splenic CD4+ and CD8+ naïve compartment from  
57 young mice resulted in the highest average UMI count (~415,000) while the splenic CD4+ central memory (CM)  
58 population yielded the lowest average UMI count (~44,000). As expected, the proportion of naïve cells in both spleen  
59 and bone marrow was higher in young than adult mice, and this was balanced by an increase in memory and especially  
60 effectors in the older mice (SI Table 1). The total UMI count was strongly correlated with the number of sorted cells  
61 across compartments and tissues (SI Fig 1C). The number of  $\alpha$  and  $\beta$  UMIs were also highly correlated (SI Fig 1D). Both  
62 these correlations provide additional confidence in the robustness and quantitative output of the overall pipeline.

### 63 The clonal structure and diversity of the repertoire varies with compartment and age.

64 We first explored the changes in the clonality and diversity of the TCR repertoire across compartments and tissues. We  
65 estimated T cell clonotype size by the number of different UMIs associated with a unique TCR, and illustrated the clonal  
66 frequency distribution of the repertoire within each population (e.g. Figs 1B and 1C for spleen; SI Fig2A and B for bone  
67 marrow). As a comparator in this, and subsequent figures, we generated a set of synthetic TCRs using SONIA, a

68 generative probabilistic model of TCR recombination which incorporates learnt parameters of the genomic TCR  
69 recombination process, without any subsequent selective expansion (Sethna et al., 2020). This serves as a useful  
70 baseline with which to compare real repertoires, in which the products of recombination have been shaped by selection  
71 and proliferation.

72 As expected, the naïve repertoires were dominated by rare TCRs (observed only once or twice in a sample) and had very  
73 few expanded clonotypes (expanded clones are represented by the darkest color in panel B, and by the points to the  
74 right in panel C). The naïve repertoires were also most similar to the synthetic repertoires. In contrast, T effectors  
75 contained much larger numbers of expanded clonotypes, and this was more pronounced in CD8+ cells from the older  
76 mice. Consistent with these distributions, the Simpson index, and the Shannon index, two commonly used measures of  
77 diversity of the repertoire, were highest in naïve populations from young individuals, and progressively lower in central  
78 memory and effectors (Fig 1D, SI Fig 2C). The Simpson and Shannon indices are examples ( $k = 2$  and  $k = 1$ , respectively)  
79 of a series of diversity measurements, which are captured by the Renyi entropy of order  $k$ , where  $k$  can run from 0 to  
80 infinity. We calculated the Renyi diversities for  $k = 0, 0.25, 0.5, 1, 2, 4$  for each repertoire and then plotted them in two  
81 dimensions using principal component analysis (PCA; Fig 1E and SI Fig 2D). In the young mice, the repertoires of naïve,  
82 central memory, effector and T regulatory cells are clearly separated by the diversity measurements alone, with almost  
83 all the variance captured in a single dimension (reflecting very consistent differences across the entire Renyi profile). In  
84 older mice, the distinction between the populations is still observed but is less clear cut, and with greater variation  
85 between individual mice. All panels in Fig 1 show the results obtained for the TCR $\beta$  repertoires (spleen), because TCR $\beta$   
86 repertoires are the most diverse and are more commonly studied. However, similar results were observed for the  $\alpha$   
87 repertoires, and the diversity of  $\alpha$  and  $\beta$  repertoires was very highly correlated (SI Fig 1E).

88 In summary, the analysis of the repertoires of different populations captures the known decreasing diversity and  
89 increasing clonality of the naïve, central memory and effector compartments in both spleen and bone marrow and the  
90 decrease in diversity observed with age. These results build further confidence in the reliability of the repertoire  
91 sequencing and analysis pipeline.

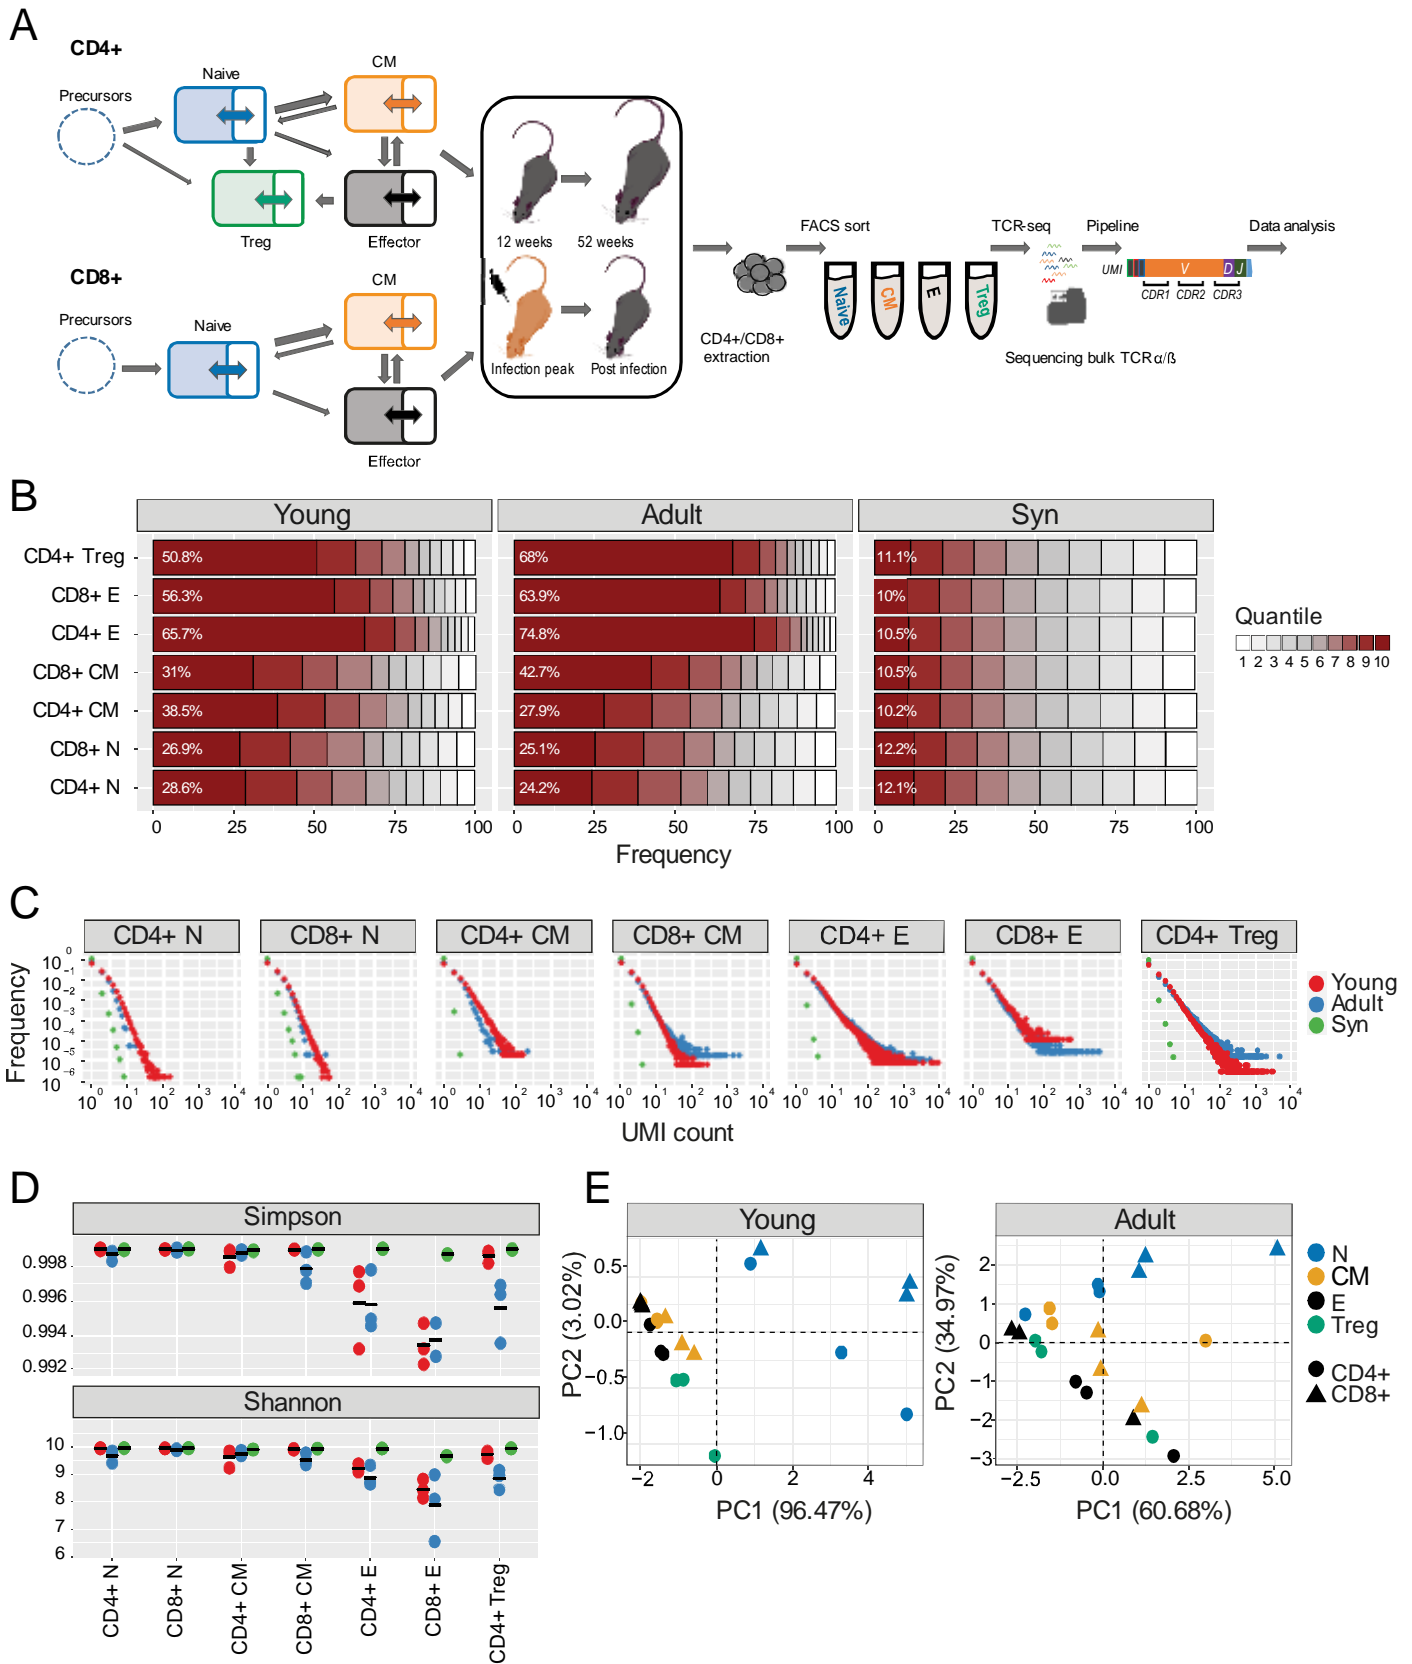

**Figure 1. Clonal expansion and diversity of the TCR $\beta$  repertoire in different subsets of young and adult mice. (A)** Summary of T cell compartments and pipeline for cell isolation and TCR repertoire sequencing and analysis. **(B)** The TCRs in each repertoire were ranked according to frequency, and the proportion within each decile is illustrated (low abundance sequences in white, ranging to high abundance sequences in dark red). The percentage of the distribution represented by the top decile is shown in white text. **(C)** The sequence abundance distribution in each compartment. The plots show the proportion of the repertoire (y-axis) made up of TCR sequences observed once, twice etc. (x-axis). Repertoires from young mice are shown with red dots, repertoires from older mice in blue dots and synthetic repertoires in green. **(D)** Simpson and Shannon scores of equal repertoires size (1000 CDR3NTs) from each compartment and mouse. Colors same as panel C. Mean is shown in black lines (n=3). **(E)** PCA of the Renyi diversities of order 0, 0.25, 0.5, 1, 2, 4.



92 **Differential V gene usage defines different sub-populations of T cells in young individuals.**

93 As reported previously (Ndifon et al., 2012)(Madi et al., 2014), both V $\alpha$  and V $\beta$  gene usage was non-uniform in all  
94 the repertoires examined, and also in the synthetic repertoire sequences, reflecting differential usage of V genes in  
95 the recombination process (Kohler et al., 2005)(SI Fig3A). However, the distribution of V gene usage also differed  
96 between T cell naïve subsets (young vs. adult, adult vs .synthetic, young vs. synthetic mice). The pairwise similarity  
97 between V gene distributions of different repertoires was quantified using the cosine similarity between the  
98 distributions (see Methods). We also used the Horne similarity index(Greiff et al., 2015)(Venturi et al., 2008) and  
99 found these two measures highly correlated (SI Fig3B).

100 A hierarchical clustered heatmap summarizes the similarity between all pairwise combinations of repertoires for  
101 TCR $\beta$  V genes (Fig 2A). In young individuals there was a clear segregation between CD4+ and CD8+ repertoires, and  
102 between naïve, central memory, effector and Treg populations. Naïve, central memory, and Tregs repertoires were  
103 most similar, while effectors were mapped to a distinct branch. In contrast, there was little distinction between  
104 spleen and bone marrow within each sub-compartment. Repertoires from the same compartment but different  
105 individuals clustered together, demonstrating that each compartment had a distinct repertoire distribution,  
106 conserved between individuals.

107 In contrast to the strong hierarchical structure observed in the TCR $\beta$  repertoires in 12-week individuals, the V $\beta$  gene  
108 usage in repertoires from older animals was much more heterogenous. Although the distinction between CD4+ and  
109 CD8+ repertoires was mostly still retained, the sub-compartments were much more inter-mingled. The repertoires of  
110 the CD8+ effector compartments, in particular, showed little similarity between individuals.

111 The structure observed in the heatmap organization was further investigated by performing principal component  
112 analysis (PCA) on the pairwise similarity matrix for V $\beta$  usage (Fig 2B) for young (top panels) and adult (bottom  
113 panels) mice. Each dot represents an individual repertoire and is colored by CD4+/CD8+ compartment (left panels),  
114 anatomical compartment (middle panels) and differentiation phenotype (right). In young mice there is a clear  
115 separation of both CD4+ and CD8+ repertoires, and of repertoires from different functional compartments. We  
116 noted that the Treg populations lie closest to the naïve, while the biggest variance is seen between effector  
117 populations. In adult mice, the separation between CD4+ and CD8+ repertoires is retained, but the distinction  
118 between functional compartments largely collapses.

119 In contrast to the TCR $\beta$  repertoires, the equivalent analysis for the  $\alpha$  repertoires (SI Fig 3C and 3D) showed much less  
120 evidence of consistent structure in either heatmap or PCA. Furthermore, there was only limited correlation between  
121 the cosine similarities of  $\alpha$  and  $\beta$  repertoires, especially in the older individuals (SI Fig 3E). The selective pressures  
122 which shape the repertoires of different CD4+ and CD8+ compartments therefore seem to be reflected differently in  
123 V $\alpha$  and V $\beta$  gene usage.

124 Since we observed that there were no systematic differences between spleen and bone marrow repertoires in terms  
125 of V $\beta$  gene distribution, we estimated the degree of variation which could be attributed to idiosyncratic differences  
126 between mice, by comparing intra-individual (between bone marrow and spleen) differences with inter-individual  
127 differences (Fig 2C). The plots illustrate a clear hierarchy of variance, with naïve repertoires being closest to each  
128 other, followed by central memory and Tregs, and with effector repertoires showing the greatest divergence. CD8+  
129 repertoires (right panels) showed greater divergence (smaller similarity indices) than CD4+ repertoires, and the adult  
130 repertoires showed greater variance than young. Interestingly the intra-individual variation was in general very  
131 similar to the inter-individual variation, the only exception being the effector CD8+ repertoires in the older animals.  
132 Thus, the high variance seen especially between effector T cell repertoires seems to be an intrinsic property of these  
133 repertoires, observed even between different compartments from the same individual. This high variance was not  
134 simply a reflection of the different sizes of the different compartments since different sized synthetic repertoires  
135 were very similar to each other (SI Fig3 F-G).

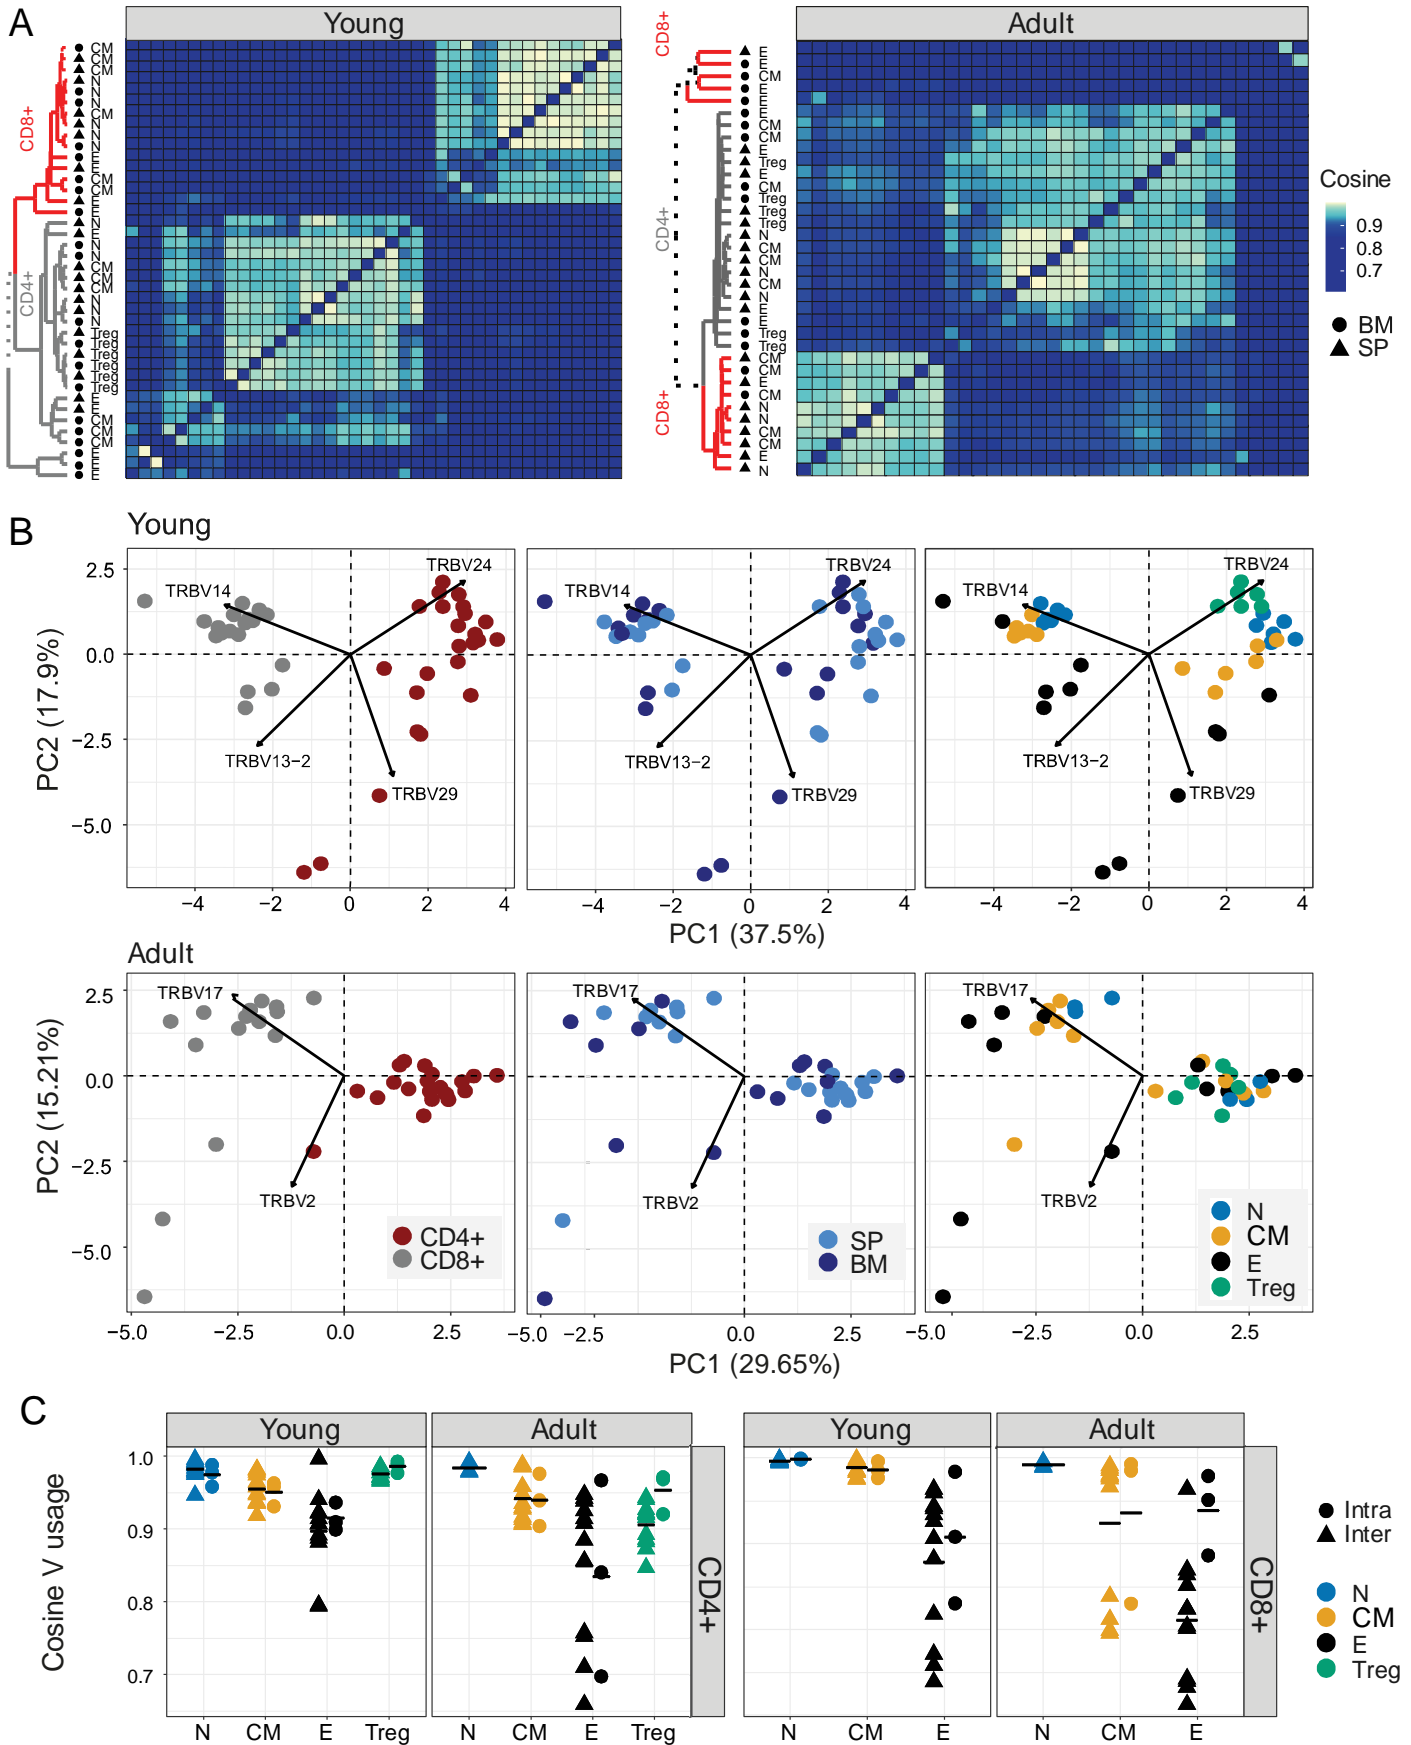

**Figure 2: Differential V gene usage defines different sub-populations of T cells in young individuals.** (A) Cosine similarity was calculated between all pairs of repertoires in young (left) or adult (right) mice and displayed as a heatmap. Hierarchical clustering dendrograms showing the organization of the assigned at each plot, colored by CD4+ and CD8+ groups (grey and red branches respectively) and labels by compartment (text and symbol). Tissues are marked in symbols shape (SP = triangles, BM = circles). (B) PCA separates the V $\beta$  usage of CD4+ and CD8+ compartments in age dependent-manner (Young in upper and Adult in lower panel). Each color represents one compartment from one mouse (e.g., CD8+ Effectors, BM, mouse 1). See legend for symbols and color code. PC1 separates between CD4+ and CD8+ classes in both age groups. PC2 divides between cell compartments in V $\beta$  usage of young mice. The V $\beta$  genes with the highest influence (loading) are marked with arrows. (C) Cosine similarity of the V $\beta$  gene usage between individuals (circles) or within individuals (between spleen and bone marrow, triangles). T cells compartments (colored dots) are divided to CD4+ (left) and CD8+ (right) from young or adult mice. Mean is shown by horizontal black lines.

## **T cell sub-compartments defined by nucleotide sequence sharing patterns.**

The TCR V gene distributions analyzed above create a simplified abstraction of individual repertoires, and TCR repertoires can also be considered as a hyperdimensional feature space defined by the millions of individual nucleotides which constitute each repertoire. In order to identify structure within this space, we first visualized the qualitative patterns of sharing between CD4+ and CD8+ sub-compartments, using circus plots (Fig 3A). This analysis, which included only sequences shared by at least two compartments, reveals a distinctive pattern of sharing which is conserved between individuals, and is age specific. In young individuals, CD4+ and CD8+ splenic naïve and CD8+ central memory repertoires contribute the highest proportion of shared sequences (blue [0.21-0.26, 0.28-0.39, CD4+ and CD8+, respectively] and orange [0.29-0.39] )circus arc lengths. Naïve repertoires from adult mice contribute a much smaller proportion (0.004-0.03, 0.03-0.12, CD4+ and CD8+ respectively) of sharing with other repertoires, and CD4+ (0.307-0.313, 0.12-0.23) and CD8+ (0.195-0.375,0.11-0.23) effectors sequences now make up the largest proportion of shared sequences (blue, black, and grey, circus arc lengths, in SP and BM respectively). Interestingly, high levels of overlap (0.172-0.307) are observed between splenic CD4+ Treg and CD4+ naïve repertoires, while in adult mice, Tregs become more similar to CD4+ effector cells (0.159-0.290), this observation is investigated in more detail below. Nucleotide sequence sharing between T cell compartments was explored in more detail using the cosine similarity index to quantify pairwise inter-repertoire TCR sharing between compartments. Because the similarity between repertoires of different individuals at nucleotide level is very low, we first analyzed each mouse separately. However, visual inspection suggested the patterns obtained for all three mice was very similar, especially for the younger individuals, and this was confirmed by quantitative comparisons of the similarity indices between the different mice (SI Fig 4A). A representative heat map of all pairwise comparisons for a single mouse is shown in Fig 3B (TCR $\beta$ ) and SI Fig 4B (TCR $\alpha$ ), and the similarity matrix is visualized in two dimension using multidimensional scaling in Fig 3C (TCR $\beta$ ) and SI Fig 4C (TCR $\alpha$ ). In young mice a hierarchical structure was observed, with naïve and Treg repertoires clustered together, and effector and central memory repertoires for CD4+ and CD8+ T cells forming distinct clusters. In older individuals, this structure is perturbed. CD4+ and CD8+ repertoires remain distinct, but Tregs now cluster independently of naïve, and are closest to CD4+ effector repertoires. As was the case for V gene similarities, there was modest correlation between TCR $\alpha$  and  $\beta$  similarities, especially in the older individuals (SI Fig 4D). The synthetic repertoires show very little sharing or structure, consistent with clonal expansion being driven by selective forces which operate subsequent to recombination (Fig3 B-C, SI Fig4 B-C, right subplots).

163 The nucleotide similarity hierarchy is illustrated in more detail for all three mice for selected compartments in Fig 3D and SI  
164 Fig 4E. Inter-individual similarity index at nucleotide level is very low in all compartments. The cosine similarity between  
165 spleen and bone marrow (i.e. intra-individual) is lowest for naïve repertoires, reflecting high diversity and limited clonal  
166 expansion. It increases for central memory repertoires, and is highest for T effectors and Tregs, reflecting lower diversity and  
167 increased clonal expansion. Strikingly, the overall intra-individual hierarchy observed is reversed compared to V region usage.  
168 Treg repertoires were more similar to themselves than to other repertoires, but more similar to CD4+ effector repertoires in  
169 older than in younger mice (SI Fig 4E). The shift from a naïve-like to an effector-like Treg observed from the perspective of  
170 repertoire sharing was also observed in phenotype, with a higher proportion of FoxP3+ CD62L+ CD44- naïve Tregs in young  
171 animals, and a higher proportion of Foxp3+ CD62L-CD44+ effector-like Tregs in the older animals (Fig 3E).

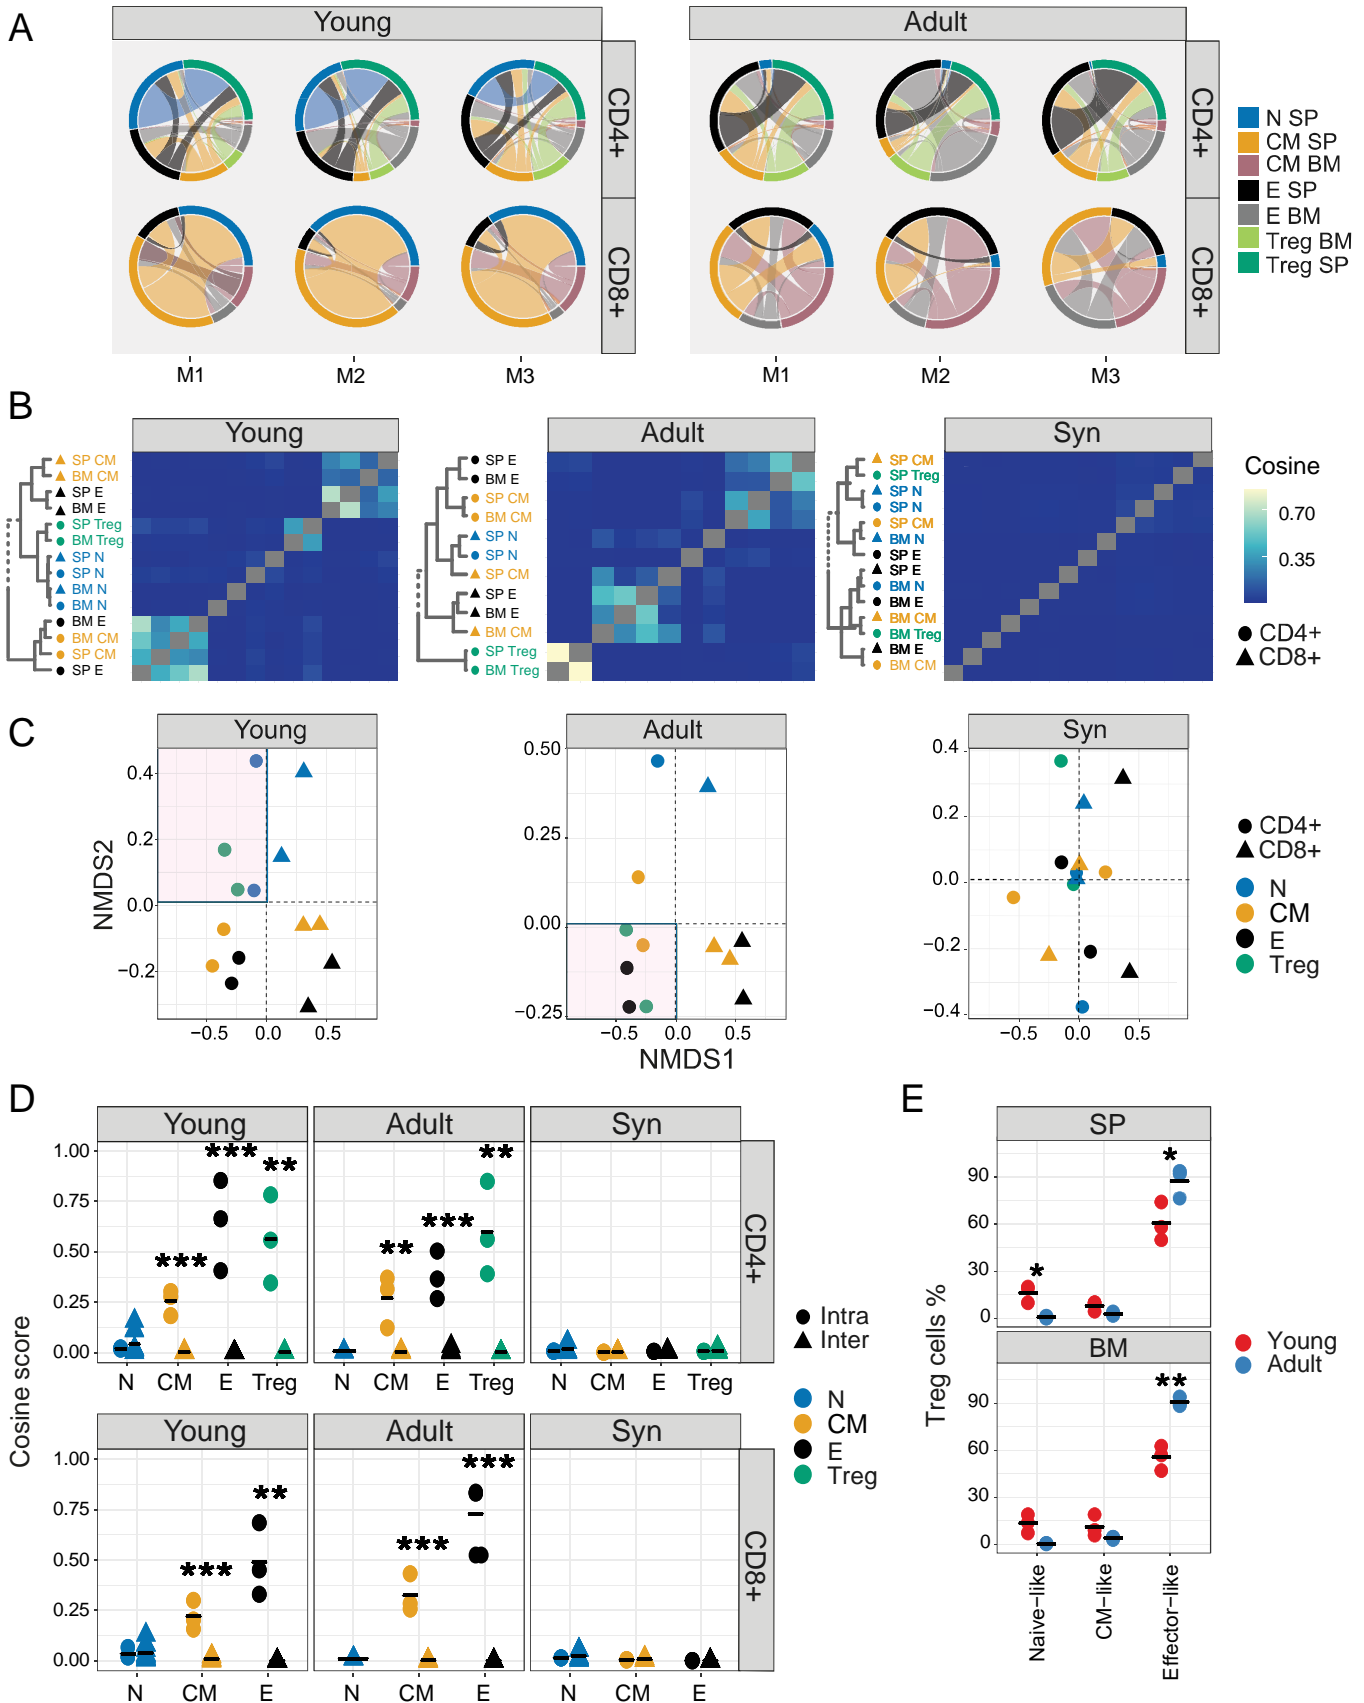

**Figure 3: Differential sharing of T cell CDR3 nucleotide sequences defines different sub-populations of T cells that change with age. (A)** Each circus plot represents a single mouse CD4+ or CD8+ compartment (upper and lower panel, respectively). Circus sharing levels illustrate the number of clones shared between two compartments (band widths), and the proportion of shared clones attributed to each compartment (circus arcs). Only sequences shared by at least two compartments were included in the analysis. **(B)** CDR3 $\beta$ NT sequences pairwise cosine similarity from representative young, adult or synthetic (“Syn”) mouse repertoires. Correlation levels are represented by color (high=light blue, low=dark blue). Hierarchical clustering dendrograms for all T cell compartments are plotted to the left of each heatmap (CD4=circle, CD8=triangles), in color and text. **(C)** The similarity matrices shown as heatmaps in B are represented in two dimensions by NMDS. **(D)** Cosine similarity between CDR3NT $\beta$  chains across (triangles) and within individuals (between spleen and bone marrow, circles). T cells compartments (colored dots) are divided to CD4+ (left) and CD8+ (right) and synthetic (“Syn”, lower) mice repertoires. Mean is shown by horizontal black lines. **(E)** The surface phenotype of Foxp3+ Tregs. The plot shows the percentage of Foxp3 positive cells (Treg): CD44- CD62L+ (naive-like), CD44+CD62L+ (CM-like) and CD44+CD62L- (effector-like). Mean is shown by horizontal black lines. Each data point represents one mouse. Significant differences between age groups or intra and inter individuals are denoted by asterisks (P-values: \* < 0.05, \*\* < 0.01, \*\*\* < 0.001, with FDR correction t-test).

## 172 **T cell compartments defined by differential frequency of amino acid motifs.**

173 The extreme hyper-dimensionality of the sequence space dominates individual patterns of clonal diversity and  
174 expansion, and limits the recognition of conserved repertoire organization. We and others (Thomas et al.,  
175 2014)(Glanville et al., 2017) have shown that short patterns of sequential amino acids (k-mers) can play a key role in  
176 determining specificity, and offer one way to reduce the dimensionality of the repertoire while reflecting the  
177 complexity of antigen recognition. We therefore counted the presence of sequential amino acid triplets  
178 (dimensionality  $3^{20}$ ) or 7-mers (dimensionality  $7^{20}$ ) in each repertoire. To further reduce the dimensionality of the  
179 feature space, we removed rarely used features as described in detail in the Methods.

180 The distribution of triplet and 7-mers frequencies are represented in two dimensions by the first two components of a  
181 PCA. The k-mer distributions separated CD4+ and CD8+ TCR $\beta$  repertoires in both young and older mice (SI Fig 5A and  
182 SI Fig 5B). In the younger repertoires, conserved distinct patterns of k-mer frequency were also evident between the  
183 naïve, Treg, central memory and effector CD4+ sub-compartments (Fig 4A and SI Fig5C), with Tregs lying close to the  
184 naïve, and central memory repertoires lying between naïve and effectors. This clear hierarchy became much more  
185 relaxed in the older individuals. Within the CD8+ compartment, central memory and naïve cells cluster together, and  
186 the overall pattern is driven by a high variance of the CD8+ effectors, which diverge from each other both within and  
187 between individuals. A similar qualitative pattern was seen for TCR $\alpha$  triplets and 7-mers, although the distinction  
188 between naïve and central memory was evident in both CD4+ and CD8+ compartments (SI Figs 6A and SI Figs 6B). The  
189 intra-individual and inter-individual cosine similarities are summarized in Figs 4B (triplets) and SI Fig 6C (7-mers).  
190 Interestingly, and similarly to what we observed in V gene distributions, the inter-individual similarities were only  
191 consistently larger than the intra-individual similarities for the CD8+ effectors.

192 We examined in more detail the differential usage of amino acid motifs between Treg and T effectors (Fig 4C, SI Fig  
193 7A). In younger repertoires ten triplet motifs were over-represented in the CD4+ effector repertoires, and seven in the  
194 Treg repertoires. In the older repertoires there was little evidence of differential motif use between these  
195 compartments (see insets). Almost all the differentially-represented triplets began with a serine (Fig 4D). The triplet  
196 motifs over-represented in the Treg repertoires were found almost exclusively at positions 3/4 of the CDR3 suggesting  
197 they may be acting as a surrogate for selective V genes; however the triplets over-represented in the T effectors were  
198 more broadly distributed across the CDR3 (Fig 4D). The 7-mers over-represented in the CD4+ T effectors were

199 predominantly found associated with a single V gene. In contrast, the 7-mers over-represented in Treg repertoires  
200 were more broadly distributed (SI Fig 7B). Overall, while V gene usage plays a part in the amino acid motif distribution  
201 profiles, selection independent of V gene is clearly at work.



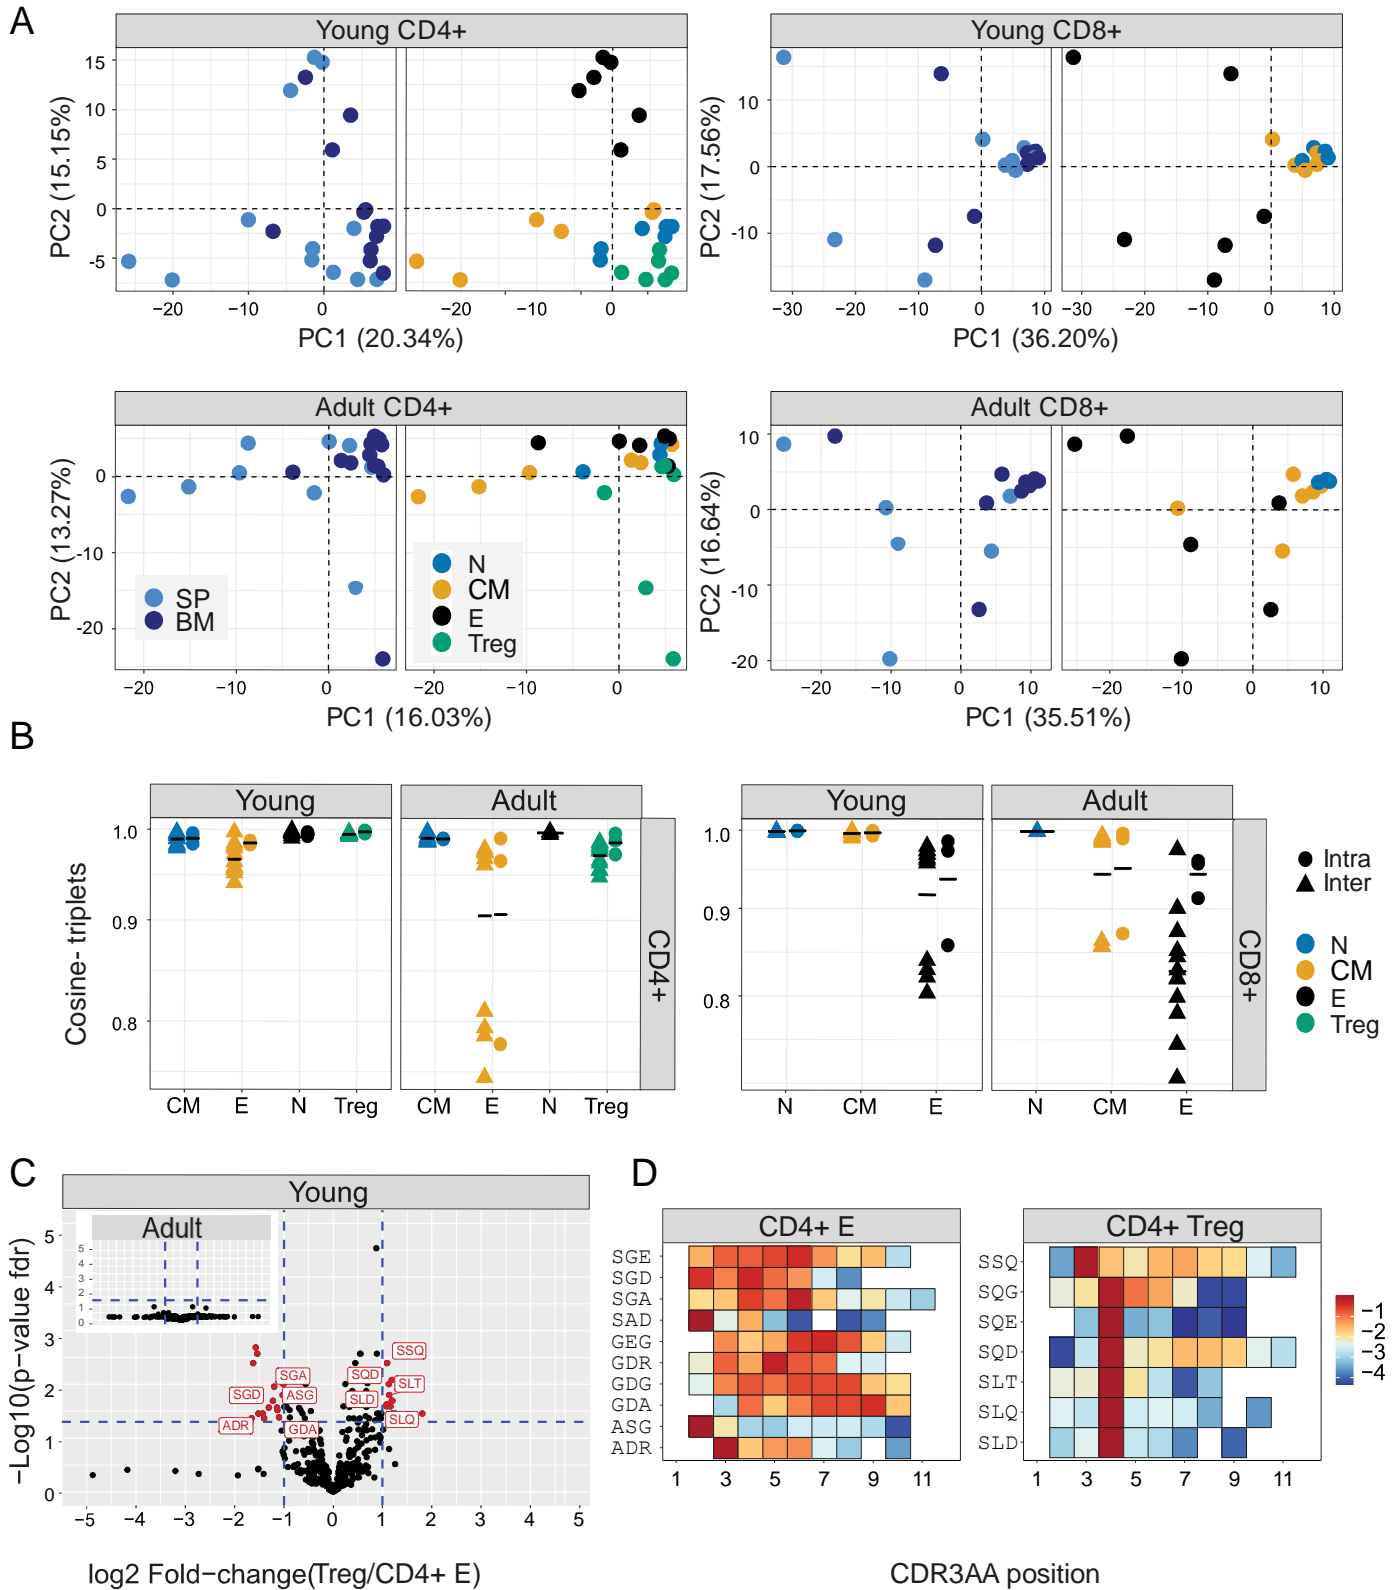

**Figure 4: CD4+ T cells compartments distinct top CDR3 $\beta$ AA triplets motifs, alter with age.** Top sequential triplets are selected by the mean frequency of each motif across all compartments and mice (**A**) CDR3 $\beta$ AA triplets PCA analysis of CD4+(left) or CD8+(right) from young (upper) or adult (lower) mouse (e.g., CD8+ effectors, BM, mouse 1). (**B**) Cosine similarity of the top (350) CDR3 $\beta$ AA triplets between individuals (circles) or within individuals (between spleen and bone marrow, triangles). T cells compartments (colored dots) are divided to CD4+ (left) or CD8+ (right) from young or adult mice. Mean is shown by horizontal black lines. (**C**) Treg and CD4+ effector differentially expressed triplets are found in young but not adult mice. Each dot represents a single triplet (- top or all 8000 triplets in red or black dots, respectively). P-value (t-test) was calculated for each triplet across six samples (three mice and 2 tissues) of CD4+ Treg and CD4+ effector cells. The y-axis shows FDR-adjusted p-values. The x-axis shows the log<sub>2</sub>-fold-change, calculated between Treg and CD4+ effector mean triplets or motifs frequency across compartments (6 samples in each). Significance thresholds are marked in blue lines: (1) at  $y=1.3$  (equivalent to p-value of 0.05) and  $x=\pm 1$  (denoting a total fold-change of 2). Representative triplets above both thresholds are labeled with red text and dots. (**D**) Significantly expressed triplets positioned in various positions along the CDR3AA sequences. Triplets overexpressed in CD4+ Treg are frequently located in position 4 of the CDR3AA's. (3-9). Triplets overexpressed in CD4 effector can be located mainly in position 2-3 or further along the CDR3AA sequences. The color represents the log<sub>10</sub> frequency of each aligned triplet.

202 **Combined feature sets which incorporate V gene, nucleotide and amino acid motif distributions can discriminate T**  
 203 **cell sub-compartments in young individuals, but these differences weaken with age.**

204 The results presented in figs 2-5 illustrate how different feature sets offer quite distinct perspectives on the  
 205 organisation of the TCR repertoire. We concatenated all the intra-individual intra-compartment, and the inter-  
 206 individual intra-compartment (spleen only) cosine similarity values from all feature sets (i.e. V gene, nucleotide, triplet  
 207 and 7-mers) into a single vector, and displayed a representation of this feature space in two dimensions by applying  
 208 PCA (Fig 5). In this representation, the distinction between CD4+ and CD8+ repertoires were lost. However, in the  
 209 repertoires of young individuals, a clear organization separating naïve, central memory, effector and Tregs is now  
 210 evident. In contrast, in adult mice the organization is mostly lost, and the populations are inter-mingled.

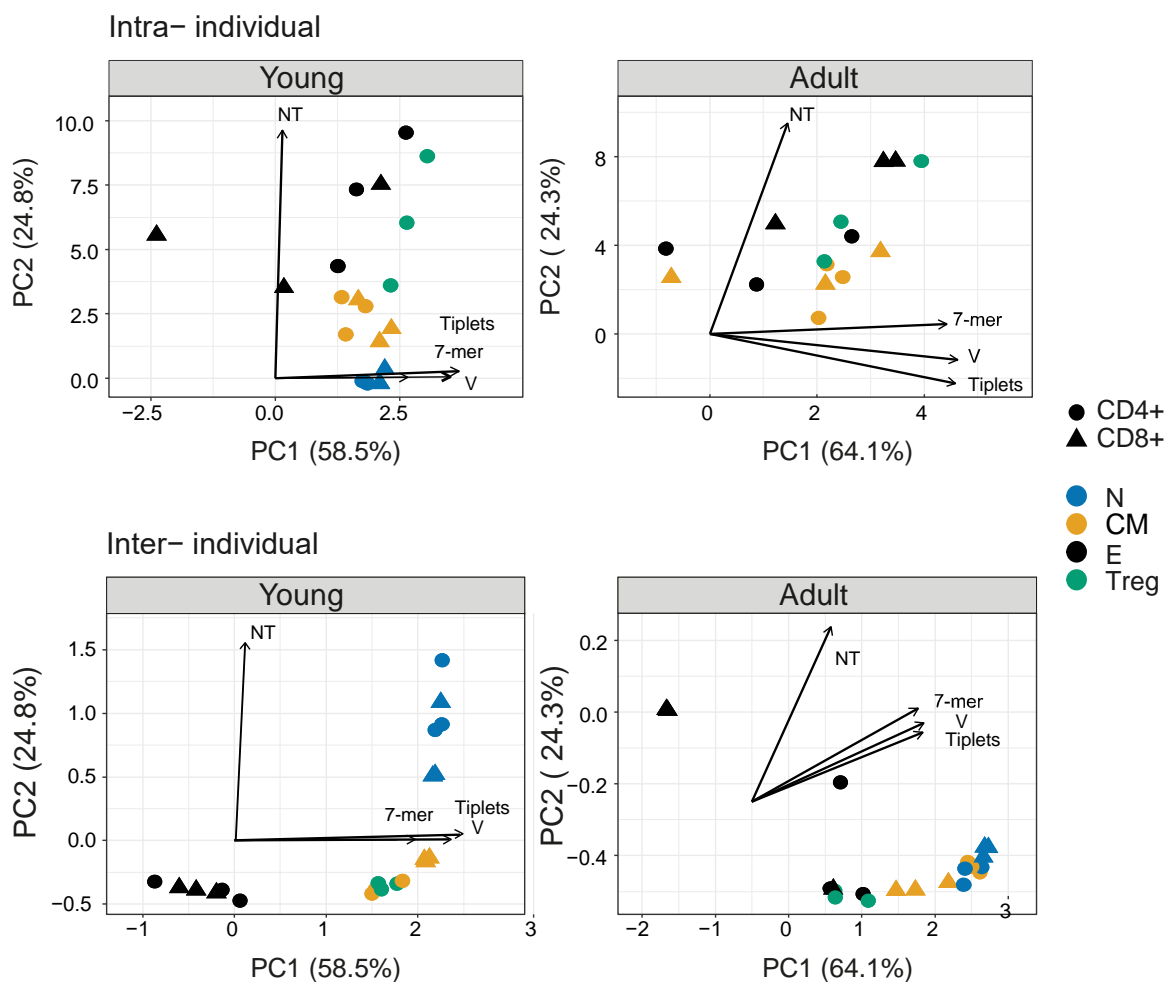

**Figure 5: PCA analysis of the combined TCR $\beta$  features separates between T cells states of young mice.** Cosine similarity calculated for the V $\beta$  usage, CDR3 $\beta$ NT, top CDR3 $\beta$ AA triplets and 7-mers motifs between T cells compartments within individuals (between spleen and bone marrow, for example: Treg BM and Treg SP from young mouse 1) or splenic compartments across mice (for example: Treg SP mouse 1 and Treg SP mouse 2). The TCR $\beta$  measurement with the highest influence is marked with arrows (V = TRBV, NT = CDR3NT, Triplets = CDR3AA triplets, 7-mer = CDR3AA 7-mers).

## 211 **The impact of LCMV infection on repertoire organization.**

212 Finally, we examined the effect of exposure to a strong immunogenic stimulus on the organization of the immune  
213 repertoires (Fig 6A). We infected C57BL/6 mice with LCMV, which drives a strong but self-limiting infection associated  
214 with a well-characterized immune response in this strain. The cosine similarity for each compartment between mice,  
215 as well as between repertoires of young and older uninfected individuals is shown for V gene, CDR3 nucleotide and  
216 amino acid triplets (Fig 6B). Infection drives a strong decrease in similarity (increase in diversity) between naïve and  
217 memory repertoires of different mice, especially evident in the V gene and triplet distributions. In the effector  
218 population, in contrast, infection drove exactly the reverse process, increasing similarity between infected individuals,  
219 and thus counteracting the normal decrease in similarity which is observed between effector repertoires of different  
220 individuals. In this case, therefore, infection is driving convergence of the effector repertoires. The increased diversity  
221 of naïve and memory compartments is seen in both CD4+ and CD8+ populations, while the decreased diversity of the  
222 effector compartment is particularly evident in the CD8+ population. The impact of infection is strongest at 8 days  
223 post-infection, when the host response is maximal (Murali-Krishna et al., 1998)(Slifka et al., 1997)and partially returns  
224 to baseline by 40 days post infection.

225 In order to understand better the convergence observed between the effector populations of infected mice, we  
226 analysed triplet usage in the CD8+ effectors of LCMV infected versus uninfected individuals. A number of triplet motifs  
227 were highly enriched in the repertoires of the LCMV infected mice (Fig 6C, sequences in SI Table 2). Many of these  
228 triplets were also observed in the TCRs of a population of T cells isolated from the infected spleens by sorting on the  
229 LCMV peptides NP396-404(H-2D<sup>b</sup>), NP205-212(H-2K<sup>b</sup>) and GP92-101(H-2D<sup>b</sup>) (Fig 6A).

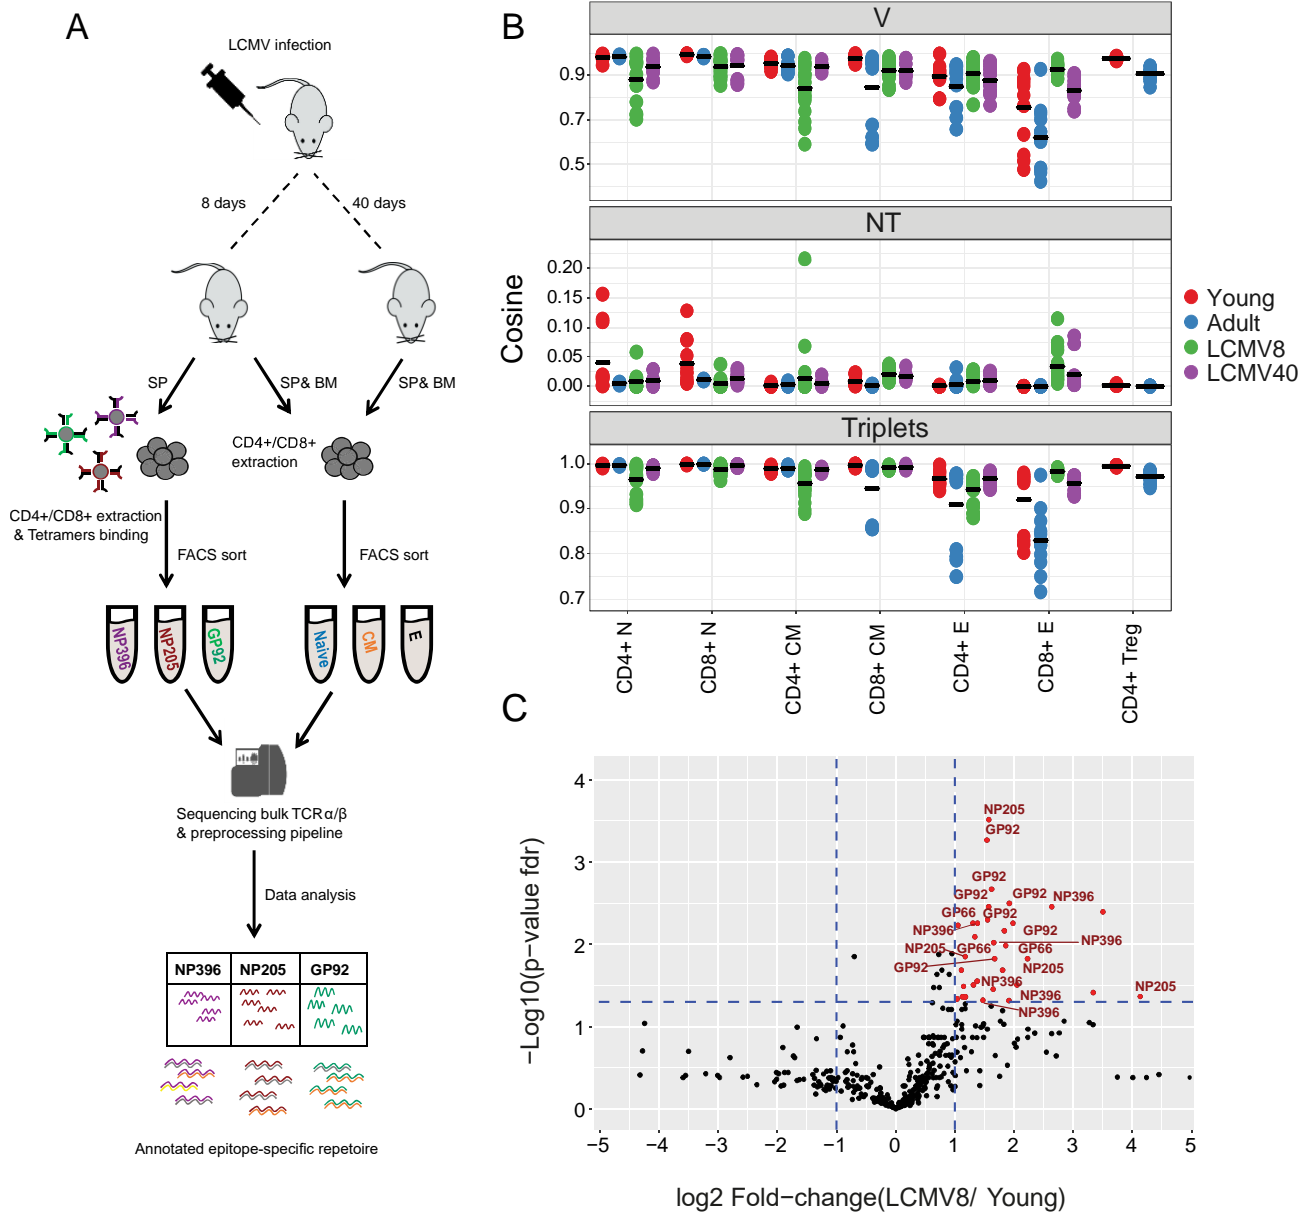

**Figure 6: T cells compartments of LCMV infected mice express distinct top amino acid triplets of  $\beta$  chain TCR repertoire. (A)** Summary of the LCMV induced T cell compartments and epitope-specific cells isolation for TCR repertoire sequencing and analysis. **(B)** Cosine similarity index of TRBV genes, CDR3 $\beta$ NT and top CDR3 $\beta$ AA 3-mers (top 350) motifs calculated between tissues and individuals. Colored dots reflect the mice groups (red = young, blue = adult, green/purple = mice after 8 and 40 days of acute LCMV infection, respectively). Mean is shown by horizontal black lines. **(C)** CD8+ effector differentially expressed triplets are found after 8 days of LCMV infection, and not in the young healthy mice. Each dot represents a single top triplet. P-value (t-test) was calculated for each triplet across six–eight samples (three–four mice and 2 tissues) of CD8+ effectors from young and LCMV infected mice. The y-axis shows FDR-adjusted p-values. The x-axis shows the log 2-fold-change, calculated between mean triplets from young and LCMV infected mice (6–8 samples in each). Significance thresholds are marked in blue lines: at  $y=1.3$  (equivalent to p-value of 0.05) and  $x=\pm 1$  (denoting a total fold-change of 2). Representative triplets above both thresholds are labeled with red text and dots. Significantly enriched triplets that are labeled in red text are found in the epitope-specific full CDR3 $\beta$ AA sequences (NP396, NP205, and GP92). 36 significantly expressed triplets are found, among them, 30 triplets are also found annotated to the epitope-specific sequences (83%).

## 230 Discussion

231 The adaptive immune system, uniquely among vertebrate physiological systems, uses a family of receptors which are  
232 not encoded in the germline, but are created de novo in each individual by a stochastic process of imprecise DNA  
233 recombination. A fundamental task for immunologists is to understand how this stochasticity and associated inter-  
234 individual heterogeneity can nevertheless result in a robust and regulated response to a enormous diversity of  
235 antigens in most individuals of a population. In this study we explore the balance between stochasticity and  
236 heterogeneity on the one hand, and order and consistency on the other. We systematically analyze the TCR repertoire  
237 of different functional and anatomical compartments of the adaptive immune system, sampled from young (3 month)  
238 and adult (12 month) mice. From this perspective, we consider the immune system as evolving in a multi-dimensional  
239 selective space. The dimensions (selective pressures) include thymic selection, peripheral differentiation (along the  
240 naïve- memory-effector axis), migration (spleen – bone marrow) and aging (illustrated in Fig 7). We document the  
241 effects of these selective processes on different features of the repertoire, which span the range from the full hyper-  
242 dimensionality of individual nucleic acid sequences ( $>10^8$  per mouse) through the enumeration of amino acid motifs (a  
243 few hundred), to the frequency of different V genes (20). We focus the analysis on quantitative measurements of  
244 similarity between repertoires, which reflects both convergent and divergent evolution of the repertoire. A recent  
245 study has reported systematic sequencing of TCR repertoire of different human T cell subsets, but the focus of their  
246 analysis was on the biochemical characteristics of the TCR(Kasatskaya et al., 2020) .

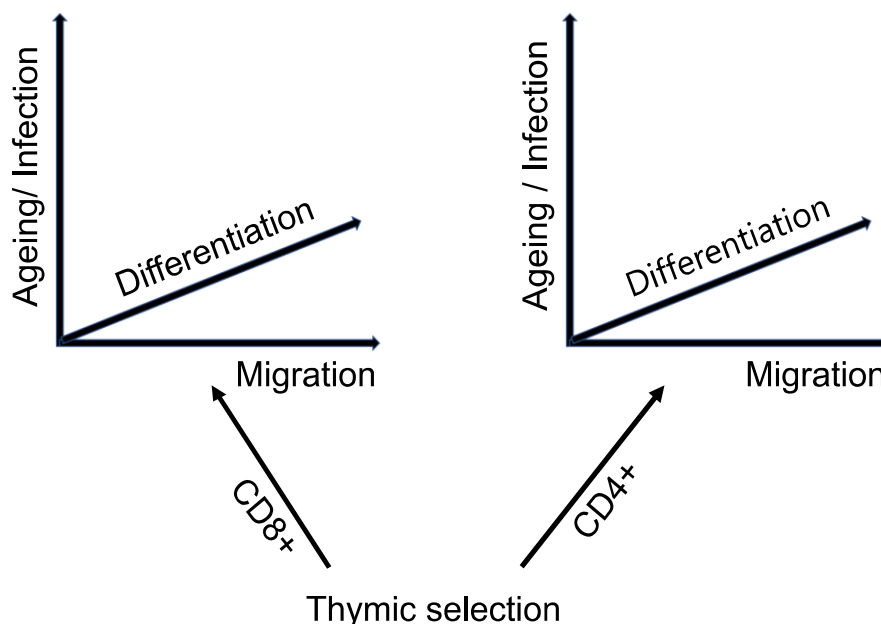

**Figure 7:** The TCR repertoire is considered as evolving in four dimensions, captured by the diagram above.

247 In the younger mice, the analysis of similarity revealed clear evidence of order, with a hierarchical structure of similarity  
248 between the different functional compartments. The most consistent feature was the clear separation between CD4+  
249 and CD8+ repertoires, which was evident in all feature sets explored, in both TCR $\alpha$  and TCR $\beta$  repertoires, and  
250 presumably reflects the MHC/peptide selection process which operates in the thymus. Notably, however, the selection  
251 operates on a complex multi-feature construct, since no one feature (V gene, amino acid motif, or even individual CDR3  
252 nucleotide sequence) could distinguish individual CD4+ from CD8+ TCRs. Within CD4+ or CD8+ compartments, the  
253 similarity from the perspective of V gene or amino acid motif frequency distributions was highest between naïve  
254 repertoires, with progressively decreasing similarity for memory and effector repertoires. Remarkably, this increasing  
255 heterogeneity was observed both between matched compartments of different mice and between the same  
256 compartment sampled in bone marrow and spleen. We hypothesise that this diversity is an intrinsic feature of the  
257 differentiation process shown in Fig 7, driven by clonal expansion in response to continuous exposure to a diverse set  
258 of self and non-self antigens. These selective forces must operate on the TCR $\alpha/\beta$  heterodimer, since the two genes are  
259 co-expressed as a single structure at the cell surface. However, the selection seems to operate rather independently on  
260 the  $\alpha$  and  $\beta$  sequences, since the patterns of inter-repertoire sharing observed for  $\alpha$  and  $\beta$  are only loosely correlated.  
261 V $\beta$  genes are much more informative than V $\alpha$  genes in terms of distinguishing functional compartments.

262 The tension between randomness and directed evolution is most evident when comparing the analysis of V gene  
263 frequencies and individual CDR3 nucleotide sequences. Similarity in V gene usage is greatest in naïve, and decreases  
264 progressively in central memory and effector repertoires. In contrast, similarity in CDR3 frequencies is lowest in naïve,  
265 because of the extreme diversity of this compartment, and increases progressively in central memory and effector  
266 repertoires. The combination of recombination and selection therefore impose a rigid pattern of V gene usage, which  
267 nevertheless encompasses an enormous diversity of TCR sequences. Memory and effector differentiation, presumably  
268 in response to antigen, drive some convergent evolution of the clonal repertoire, reflected by increasing similarity of  
269 nucleotide sequence repertoires, but paradoxically increasingly disturbing the rigid pattern of V gene usage.

270 In the older mice, elements of the structure remain, but aging and the much longer exposure to the antigenic  
271 environment significantly loosen the initial rigid structure evident in V gene and amino acid motif frequency. CD4+ and  
272 CD8+ repertoires, for example, remain clearly distinct in all feature sets. However, the clear segregation between naïve,  
273 central memory and effector repertoires becomes blurred, and the overall pattern of similarity is increasingly driven by

274 the idiosyncratic effector repertoires which differ both at V gene and at amino acid motif level. The Treg population  
275 show a distinctive distribution of similarities. In both young and adult mice, the Treg repertoires are more similar to  
276 themselves than to any other compartment, confirming the distinct nature of the Treg repertoire, which has been  
277 hypothesized to arise from exposure to a distinct set of antigens (Wyss et al., 2016)(Bolotin et al., 2017). However, the  
278 Treg repertoires are more similar to naïve repertoires in the younger individuals, but become more similar to effector  
279 repertoires with age. The switch from a naïve-like to a more effector-like repertoire, which is also observed at a  
280 phenotypic level by increased expression of CD44 and decreased expression of CD62L may reflect a life-long gradual  
281 recruitment of induced Tregs to the original natural Treg population emerging from the thymus(Darrigues et al., 2018).  
282 The switch of regulatory T cells to a more effector phenotype might also represent a weakening of regulatory activity,  
283 and hence be linked to the increase in autoimmunity associated with age.

284 The response to environmental antigens drives many of the differentiation and age-associated changes which we  
285 describe. Since the mice are housed in specific pathogen free conditions, and are not germ-free, this may include a  
286 variety of microbial antigens present in the environment. However, although the mice are co-housed, the individual  
287 antigen exposure may be heterogenous and asynchronous. We therefore investigated the impact of exposure to a  
288 strong synchronous exogenous antigenic stimulus, by infecting the mice with LCMV, which produces a strong but self-  
289 limiting infection in the C57Bl/6 strain. The immune response to this virus has been studied extensively(Zhou et al.,  
290 2012), and is known to involve strong systemic clonal expansion by both CD4+ and CD8+ T cells. Indeed, as expected,  
291 the repertoires at 8 days post-infection, when the immune response is strongest (Murali-Krishna et al., 1998)(Slifka et  
292 al., 1997) showed evidence of perturbation. Interestingly, LCMV induced a marked decrease in similarity in both V gene  
293 and amino acid motif usage in both CD4+ and CD8+ naïve repertoires, perhaps reflecting increased turnover and  
294 perturbation of this compartment in response to the infection. However, in contrast to the changes observed in  
295 response to chronic environmental antigen stimulation, LCMV drove an increased similarity of effector repertoires. This  
296 was reflected not only in V gene and CDR3 nucleotide distributions, but was evidenced by the existence of amino acid  
297 triplets highly enriched in the TCR repertoire of infected individuals. Remarkably, many of these triplets were found  
298 within the set of CDR3s of CD8+ TCRs which bound one specific epitope of LCMV, confirming the link between motifs  
299 and specific antigen recognition. Thus, exposure to a strong synchronous source of antigen, such as is provided by acute

300 exposure to LCMV, drives strong convergent evolution and decreased diversity of the TCR effector repertoire, which  
301 relaxes partially towards the uninfected state at 40 days post-infection.

302 The study we present has a number of limitations. The number of individuals analysed was small, limiting the amount  
303 of robust statistical analysis which can be carried out. Thus, many of the conclusions we make are based on statistical  
304 trends rather than classical statistical significance thresholds. Furthermore, the analysis of the effects of aging are  
305 limited to two time points, and would benefit from extension to very young or very old mice. We also recognize that the  
306 functional sub-compartments we define are based on a rather simplistic and limited panel of antibody markers, and  
307 that in reality the populations we refer to as naïve, central memory and effector certainly contain further heterogeneity  
308 which could be explored further in future studies.

309 In conclusion, we present a novel approach to the analysis of the TCR repertoire which we use to address the  
310 fundamental relationship between stochastic and deterministic processes which drive evolution of the adaptive  
311 repertoire. The adaptive immune system shows a remarkable capability to preserve high-order structure, as reflected  
312 by conserved frequency distributions of V gene and short amino acid linear motifs, while still allowing enormous  
313 diversity at individual sequence level. This high order structure is partially preserved but gradually weakened as the  
314 adaptive immune system ages. We speculate that this structure is key to maintaining a robust consistent antigen-specific  
315 response across a population in the face of the randomness and heterogeneity imposed by the process of imprecise TCR  
316 recombination.



## 317 **Materials and methods**

318 **Animals:** All experiments except for the LCMV infections were carried out using inbred female Foxp3-GFP (C57BL/6  
319 background) mice sacrificed at three months (young) and one year (adults). All animals were handled according to  
320 regulations formulated by The Weizmann Institute's Animal Care and Use Committee and maintained in a pathogen-  
321 free environment.

322 **LCMV infections:** Females C57BL/6 mice at 5 weeks old (Envigo) were injected with Intraperitoneal with the  
323 Armstrong LCMV strain. Mice were collected after 8 or 40 days of infection.

324 **Sample preparation and T cell isolation.** Spleens were dissociated with a syringe plunger and single cell suspensions  
325 treated with ammonium-chloride potassium lysis buffer to remove erythrocytes. Bone marrows were extracted from  
326 the femur and tibiae of the mice and washed with PBS. Samples were loaded on MACS column (Miltenyi Biotec) and T  
327 cells were isolated according to manufacturer's protocol. Bone marrows cells were purified with CD3+ T isolated kit  
328 (CD3 $\epsilon$  MicroBead Kit, mouse, 130-094-973, Miltenyi Biotec). Splenic CD4+ and CD8+ cells were purified in two steps:  
329 (1) CD4+ positive selection (CD4+ T Cell Isolation Kit, mouse, 130-104-454, Miltenyi) (2) the negative cells fraction were  
330 further selected for the CD8+ positive cells (CD8a+ T Cell Isolation Kit, mouse, 130-104-07, Miltenyi Biotec). For the  
331 tetramers binding reaction, we pooled splenocytes from previously vaccinated mice (5 mice after 8 days of infection)  
332 and purified their T cells using the untouched isolation kit (Pan T Cell Isolation Kit II, mouse, 130-095-130, Miltenyi  
333 Biotec).

334 **Flow cytometry analysis and cells sorting:** The following fluorochrome-labeled mouse antibodies were used according  
335 to the manufacturers' protocols: PB or Percp/cy5.5 anti-CD4+, PB or PreCP/cy5.5 anti-CD8+, PE or PE/cy7 anti-CD3+,  
336 APC anti-CD62L, Fitc or PE/cy7 anti-CD44 (Biolegend). Cells were sorted on a SORP-FACS-AriaII and analyzed using  
337 FACSDiva (BD Biosciences) and FlowJo (Tree Star) software. Sorted cells were centrifuged (450g for 10 minutes) prior  
338 to RNA extraction.

339 **LCMV -tetramers staining and FACS sorting:** Three monomers (NIH Tetramer Core Facility) with different LCMV  
340 epitopes were used: MHCI- NP396-404(H-2D<sup>b</sup>), MHCI- NP205-212(H-2K<sup>b</sup>), MHCI- GP92-101 (H-2D<sup>b</sup>). Tetramers were  
341 constructed by binding Biotinylated monomers with PE/APC – conjugated- streptavidin (according to the NIH  
342 protocol). Purified T cells were stained with FITC anti-CD4+ and PB anti-CD8+ and followed by tetramers staining (two

343 tetramers together), for 30 min at room temperature (0.6ug/ml). CD8+ epitope-specific cells were sorted from single-  
344 positive gates for one type of tetramer.

345 **Library preparation for TCR-seq:** All libraries in this work were prepared according to the published method(Oakes et  
346 al., 2017), with minor adaptations for mice. Briefly, we extracted total RNA from CD4+/CD8+/CD3+ T cells (from spleen  
347 or bone marrow) of Foxp3-GFP or C57BL/6 mice using RNeasy Micro Kit (Qiagen) and cleaned from excess DNA with  
348 DNase 1 enzyme (Promega). RNA samples were reverse transcribed to cDNA and an anchor sequence at the variable  
349 part of the TCR was added using single strand ligation. Ligation products were amplified by PCR in three reactions,  
350 using an extension PCR to add Illumina sequencing primers, indices and adaptors. Our modified protocol for mice  
351 included specific primers for the constant region of the TCR  $\alpha$  or  $\beta$  chain  
352 (“GAGACCGAGGATCTTTAACTGG”, “GCTTTTGATGGCTCAAACAAGG”, for  $\alpha$  and  $\beta$  chain respectively). These primers are  
353 used in the reverse transcription (RT) and the first two PCR reactions (PCR1: “CAGCAGGTTCTGGGTTCTGGATG”,  
354 TGGGTGGAGTCACATTTCTCAGATCCT”, for  $\alpha$  and  $\beta$  chain respectively). Primers in the second round of the PCR included  
355 TCR constant region sequence, together with a six base pair Illumina index for multiplex sequencing, six random base  
356 pairs to improve cluster calling at the start of read 1, and the Illumina SP1 sequencing primer (PCR2:  
357 “ACACTCTTCCCTACACGACGCTCTCCGATCTHNHNNH-index-CAGCAGGTTCTGGGTTCTGGATG”,  
358 “ACACTCTTCCCTACACGACGCTCTCCGATCTHNHNNH-index-GGTGGGAACACGTTTTTCAGGTCCTC”, for  $\alpha$  and  $\beta$  chain  
359 respectively). In the third round of the PCR, the primers were the SP1 and SP5 Illumina adaptors (PCR3:  
360 “CAAGCAGAAGACGGCATAACGAGAT “, “AATGATACGGCGACCACCGAGATCTACACTCTTCCCTACACGACGCTCTTCC”,  
361 forward and reverse respectively). All PCR reactions were done using KAPA HiFi high fidelity proof reading polymerase  
362 (KAPA Biosystems). Libraries were sequenced using NexSeq 550 (200 bp forward read, 100 bp reverse) (Illumina).

363 **Pre-Processing and Error Correction for Raw Reads:** Data was processed using an in-house pipeline, coded in R. First,  
364 we transfer the UMI sequence from the read2 to read1 sequence. Trimmomatic(Bolger et al., 2014) was used to filter  
365 out the raw reads containing bases with Q-value  $\leq 20$  and trim reads containing adaptor sequences. The remaining  
366 reads were separated according to their barcodes and reads containing the constant region for  $\alpha$  or  $\beta$  chain primers  
367 sequences were filtered (CAGCAGGTTCTGGGTTCTGGATG/ TGGGTGGAGTCACATTTCTCAGATCCT  $\alpha$  and  $\beta$  chain  
368 respectively), allowing up to three mismatches. Bowtie 2(Langmead and Salzberg, 2012) (using sensitive local  
369 alignment parameters) was used to align the reads to the germline V/J gene segments, as found in IMGT germline. The

370 CDR3 nucleotide sequences were translated to amino-acid sequence in two steps. The N-terminal Cysteine was  
371 identified by matching it to the V aligned region. Then the C-terminal Phenylalanine was identified by matching it to  
372 the J aligned region. Up to one mismatch was allowed per 18-stretch sequence, ending with the Cys or starting at the  
373 Phe. CDR3AA sequences were defined according to IMGT convention. To correct for possible sequence errors, we  
374 cluster the sequences UMI's in two steps; (1) UMI's with highest frequency grouped within a Levenshtein distance of  
375 1. (2) Out of these sequences, CDR3AA sequences (starting from the most frequent sequence in a group) were  
376 clustered using a Hamming distance(Hamming, 1950) threshold of 4. Finally, the UMI of each CDR3 sequence was  
377 counted, and UMI count reads with one copy number were filtered out. For the entire analysis, sequences were used  
378 only if they were fully annotated (both V and J segments assigned), in-frame (i.e., they encode for a functional peptide  
379 without stop codons) and with copy number greater than one. In addition, we removed the invariant  $\alpha$  chain of the  
380 iNKT CDR3 sequence ("CVVGDRGSALGRLHF"(Greenaway et al., 2013), 0.001% from all sequence in our data).

381 **Statistical Analysis:** All statistical analysis was performed using R Statistical Software. For the pre-processing pipeline  
382 we used the "ShortRead" package(Morgan et al., 2009). The package "vegan"(Dixon, 2003) was used to measure the  
383 Simpson and Shannon indices(Leinster and Cobbold, 2012)(Mehr et al., 2012). We also used it to compute the Horn  
384 similarly index(Greiff et al., 2015)(Venturi et al., 2008) and to project the Nonmetric Multidimensional Scaling(Faith, D.  
385 P, Minchin, P. R. and Belbin, 1987). The Horn index relies on both overlap and abundancy of sequences, as evaluated  
386 by the unique molecular identifier count (UMI count) (Shugay et al., 2014)(Friedensohn et al., 2017). For the PCA  
387 analysis we applied the "factoextra" package(A. Kassambara, 2017) and the "ggplot2" (Wickham H, 2009) was used for  
388 generating figures.

389 **Data availability:**

390 All DNA sequences from young and adult mice have been submitted to the Sequence Read Archive under identifier  
391 PRJNA771880.

392 [https://www.ncbi.nlm.nih.gov/Traces/study/?acc=PRJNA771880&o=acc\\_s%3Aa](https://www.ncbi.nlm.nih.gov/Traces/study/?acc=PRJNA771880&o=acc_s%3Aa)

## Acknowledgements

This study was initiated and conceived by our friend, mentor and colleague Dr. Nir Friedman (last author). Sadly, Nir died after a long battle with illness without being able to complete the work. We have tried to complete this study in the spirit in which it was undertaken, but we are conscious that we fall far short of the insight and clarity of Nir's remarkable intellect. We dedicate this study to his memory.

BC was supported by a Weston Visiting Professorship from the Weizmann Institute of Science, and by a grant from the Rosetrees Foundation, UK. NF was supported by the Applebaum Family Foundation,

## References

- A. Kassambara FM. 2017. Package “factoextra.” R Top. Doc.
- Arnold CR, Wolf J, Brunner S, Herndler-Brandstetter D, Grubeck-Loebenstein B. 2011. Gain and Loss of T Cell Subsets in Old Age—Age-Related Reshaping of the T Cell Repertoire. *J Clin Immunol* **31**:137–146. doi:10.1007/s10875-010-9499-x
- Baliu-Piqué M, Verheij MW, Drylewicz J, Ravesloot L, de Boer RJ, Koets A, Tesselaaar K, Borghans JAM. 2018. Short Lifespans of Memory T-cells in Bone Marrow, Blood, and Lymph Nodes Suggest That T-cell Memory Is Maintained by Continuous Self-Renewal of Recirculating Cells. *Front Immunol* **9**:1–14. doi:10.3389/fimmu.2018.02054
- Bolger AM, Lohse M, Usadel B. 2014. Trimmomatic: a flexible trimmer for Illumina sequence data. *Bioinformatics* **30**:2114–2120. doi:10.1093/bioinformatics/btu170
- Bolotin DA, Poslavsky S, Davydov AN, Frenkel FE, Fanchi L, Zolotareva OI, Hemmers S, Putintseva E V, Obratsova AS, Shugay M, Ataulkhanov RI, Rudensky AY, Schumacher TN, Chudakov DM. 2017. Antigen receptor repertoire profiling from RNA-seq data. *Nat Biotechnol* **35**:908–911. doi:10.1038/nbt.3979
- Britanova O V., Putintseva E V., Shugay M, Merzlyak EM, Turchaninova MA, Staroverov DB, Bolotin DA, Lukyanov S, Bogdanova EA, Mamedov IZ, Lebedev YB, Chudakov DM. 2014. Age-related decrease in TCR repertoire diversity measured with deep and normalized sequence profiling. *J Immunol* **192**:2689–98. doi:10.4049/jimmunol.1302064
- Darrigues J, van Meerwijk JPM, Romagnoli P. 2018. Age-Dependent Changes in Regulatory T Lymphocyte Development and Function: A Mini-Review. *Gerontology* **64**:28–35. doi:10.1159/000478044
- Di Rosa F, Pabst R. 2005. The bone marrow: a nest for migratory memory T cells. *Trends Immunol* **26**:360–366. doi:10.1016/j.it.2005.04.011
- Dixon P. 2003. VEGAN, a package of R functions for community ecology. *J Veg Sci* **14**:927–930. doi:10.1111/j.1654-1103.2003.tb02228.x
- Faith, D. P., Minchin, P. R. and Belbin L. 1987. Compositional dissimilarity as a robust measure of ecological distance. *Vegetatio* **69**:57–68. doi:10.1021/ja00731a055
- Friedensohn S, Khan TA, Reddy ST. 2017. Methodologies in High-Throughput Sequencing of Immune Repertoires Advanced. *Trends Biotechnol* **35**:203–214. doi:10.1016/j.tibtech.2016.09.010
- Glanville J, Huang H, Nau A, Hatton O, Wagar LE, Rubelt F, Ji X, Han A, Krams SM, Pettus C, Haas N, Arlehamn CSL, Sette A, Boyd SD, Scriba TJ, Martinez OM, Davis MM. 2017. Identifying specificity groups in the T cell receptor repertoire. *Nature* **547**:94–98. doi:10.1038/nature22976
- Greenaway HY, Ng B, Price DA, Douek DC, Davenport MP, Venturi V. 2013. NKT and MAIT invariant TCR $\alpha$  sequences can be produced efficiently by VJ gene recombination. *Immunobiology* **218**:213–224. doi:10.1016/j.imbio.2012.04.003
- Greiff V, Miho E, Menzel U, Reddy ST. 2015. Bioinformatic and Statistical Analysis of Adaptive Immune Repertoires. *Trends Immunol* **36**:738–749. doi:10.1016/j.it.2015.09.006
- Gulwani-Akolkar B, Shi B, Akolkar PN, Ito K, Bias WB, Silver J. 1995. Do HLA genes play a prominent role in determining T cell receptor V alpha segment usage in humans? *J Immunol* **154**:3843–51.
- Hamming RW. 1950. Error Detecting and Error Correcting Codes. *Bell Syst Tech J* **29**:147–160. doi:10.1002/j.1538-7305.1950.tb00463.x
- Heather JM, Best K, Oakes T, Gray ER, Roe JK, Thomas N, Friedman N, Noursadeghi M, Chain B. 2016. Dynamic perturbations of the T-Cell receptor repertoire in chronic HIV infection and following antiretroviral therapy. *Front Immunol* **6**:1–15. doi:10.3389/fimmu.2015.00644
- Jörg J., Qi Q, Olshen RA, Weyand CM. 2015. High-throughput sequencing insights into T-cell receptor repertoire diversity in aging. *Genome Med* **7**:15–17. doi:10.1186/s13073-015-0242-3
- Kasatskaya SA, Ladell K, Egorov ES, Miners KL, Davydov AN, Metsger M, Staroverov DB, Matveyshina EK, Shagina IA, Mamedov IZ, Izraelson M, Shelyakin P V., Britanova O V., Price DA, Chudakov DM. 2020. Functionally specialized human CD4+ T-cell subsets express physicochemically distinct TCRs. *Elife* **9**:1–22. doi:10.7554/eLife.57063
- Kavazović I, Polić B, Wensveen FM. 2018. Cheating the Hunger Games; Mechanisms Controlling Clonal Diversity of CD8 Effector and Memory Populations. *Front Immunol* **9**:1–8. doi:10.3389/fimmu.2018.02831
- Kohler S, Wagner U, Pierer M, Kimmig S, Oppmann B, Möwes B, Jülke K, Romagnani C, Thiel A. 2005. Post-thymic in vivo proliferation of naive CD4+ T cells constrains the TCR repertoire in healthy human adults. *Eur J Immunol* **35**:1987–1994. doi:10.1002/eji.200526181
- Langmead B, Salzberg SL. 2012. Fast gapped-read alignment with Bowtie 2. *Nat Methods* **9**:357–9. doi:10.1038/nmeth.1923
- Lee HM, Bautista JL, Scott-Browne J, Mohan JF, Hsieh CS. 2012. A Broad Range of Self-Reactivity Drives Thymic Regulatory T Cell Selection to Limit Responses to Self. *Immunity* **37**:475–486. doi:10.1016/j.immuni.2012.07.009
- Leinster T, Cobbold CA. 2012. Measuring diversity: the importance of species similarity. *Ecology* **93**:477–489. doi:10.1890/10-2402.1
- Li HM, Hiroi T, Zhang Y, Shi A, Chen G, De S, Metter EJ, Wood WH, Sharov A, Milner JD, Becker KG, Zhan M, Weng N -p. 2016. TCR repertoire of CD4+ and CD8+ T cells is distinct in richness, distribution, and CDR3 amino acid composition. *J Leukoc Biol* **99**:505–513. doi:10.1189/jlb.6a0215-071rr
- Madi A, Shifrut E, Reich-Zeliger S, Gal H, Best K, Ndifon W, Chain B, Cohen IR, Friedman N. 2014. T-cell receptor repertoires share a restricted set of public and abundant CDR3 sequences that are associated with self-related immunity. *Genome Res* **24**:1603–1612. doi:10.1101/gr.170753.113
- Mehr R, Sternberg-Simon M, Michaeli M, Pickman Y. 2012. Models and methods for analysis of lymphocyte repertoire generation, development, selection and evolution. *Immunol Lett* **148**:11–22. doi:10.1016/j.imlet.2012.08.002
- Morgan M, Anders S, Lawrence M, Aboyoun P, Pagès H, Gentleman R. 2009. ShortRead: A bioconductor package for input, quality assessment and exploration of high-throughput sequence data. *Bioinformatics* **25**:2607–2608. doi:10.1093/bioinformatics/btp450
- Murali-Krishna K, Altman JD, Suresh M, Sourdive DJD, Zajac AJ, Miller JD, Stransky J, Ahmed R. 1998. Counting antigen-specific CD8 T cells: a reevaluation of bystander activation during viral infection. *Immunity* **8**:177–87. doi:10.1016/s1074-7613(00)80470-7
- Ndifon W, Gal H, Shifrut E, Aharoni R, Yissachar N, Waysbort N, Reich-Zeliger S, Arnon R, Friedman N. 2012. Chromatin conformation governs T-cell receptor J $\beta$  gene segment usage. *Proc Natl Acad Sci U S A* **109**:15865–70. doi:10.1073/pnas.1203916109
- Oakes T, Heather JM, Best K, Byng-Maddick R, Husovsky C, Ismail M, Joshi K, Maxwell G, Noursadeghi M, Riddell N, Ruehl T, Turner CT, Uddin I, Chain B. 2017. Quantitative characterization of the T cell receptor repertoire of naive and memory subsets using an integrated experimental and computational pipeline which is robust, economical, and versatile. *Front Immunol* **8**:1–17. doi:10.3389/fimmu.2017.01267
- Pacholczyk R, Ignatowicz H, Kraj P, Ignatowicz L. 2006. Origin and T Cell Receptor Diversity of Foxp3+CD4+CD25+ T Cells. *Immunity* **25**:249–259. doi:10.1016/j.immuni.2006.05.016
- Pogorelyy M V., Minervina AA, Touzel MP, Sycheva AL, Komech EA, Kovalenko EI, Karganova GG, Egorov ES, Komkov AY, Chudakov DM, Mamedov IZ, Mora T, Walczak AM, Lebedev YB. 2018. Precise tracking of vaccine-responding T cell clones reveals convergent and personalized response in identical twins. *Proc Natl Acad Sci U S A* **115**:12704–12709. doi:10.1073/pnas.1809642115
- Qi Q, Liu Y, Cheng Y, Glanville J, Zhang D, Lee J-Y, Olshen RA, Weyand CM, Boyd SD, Goronzy JJ. 2014. Diversity and clonal selection in the human T-cell repertoire. *Proc Natl Acad Sci* **111**:13139–13144. doi:10.1073/pnas.1409155111
- Sethna Z, Isacchin G, Dupic T, Mora T, Walczak AM, Elhanati Y. 2020. Population variability in the generation and selection of T-cell repertoires. *PLoS Comput Biol* **16**:1–17. doi: https://doi.org/10.1101/2020.01.08.899682
- Shifrut E, Baruch K, Gal H, Ndifon W, Deczkowska A, Schwartz M, Friedman N. 2013. CD4(+) T Cell-Receptor Repertoire Diversity is Compromised in the Spleen but Not in the Bone Marrow of Aged Mice Due to Private and Sporadic Clonal Expansions. *Front Immunol* **4**:379. doi:10.3389/fimmu.2013.00379
- Shugay M, Britanova O V., Merzlyak EM, Turchaninova MA, Mamedov IZ, Tuganbaev TR, Bolotin DA, Staroverov DB, Putintseva E V., Plevova K, Linnemann C, Shagin D, Pospisilova S, Lukyanov S, Schumacher TN, Chudakov DM. 2014. Towards error-free profiling of immune repertoires. *Nat Methods* **11**:653–655. doi:10.1038/nmeth.2960
- Slifka MK, Whitmire JK, Ahmed R. 1997. Bone marrow contains virus-specific cytotoxic T lymphocytes. *Blood* **90**:2103–2108. doi:10.1182/blood.v90.5.2103

- Smigiel KS, Richards E, Srivastava S, Thomas KR, Dudda JC, Klonowski KD, Campbell DJ. 2014. CCR7 provides localized access to IL-2 and defines homeostatically distinct regulatory T cell subsets. *J Exp Med* **211**:121–136. doi:10.1084/jem.20131142
- Snook JP, Kim C, Williams MA. 2018. TCR signal strength controls the differentiation of CD4 + effector and memory T cells. *Sci Immunol* **3**:eaas9103. doi:10.1126/sciimmunol.aas9103
- Stritesky GL, Jameson SC, Hogquist KA. 2012. Selection of Self-Reactive T Cells in the Thymus. *Annu Rev Immunol* **30**:95–114. doi:10.1146/annurev-immunol-020711-075035
- Thiault N, Darrigues J, Adoue V, Gros M, Binet B, Perals C, Leobon B, Fazilleau N, Joffre OP, Robey EA, Van Meerwijk JPM, Romagnoli P. 2015. Peripheral regulatory T lymphocytes recirculating to the thymus suppress the development of their precursors. *Nat Immunol* **16**:628–634. doi:10.1038/ni.3150
- Thomas N, Best K, Cinelli M, Reich-Zeliger S, Gal H, Shifrut E, Madi A, Friedman N, Shawe-Taylor J, Chain B. 2014. Tracking global changes induced in the CD4 T-cell receptor repertoire by immunization with a complex antigen using short stretches of CDR3 protein sequence. *Bioinformatics* **30**:3181–3188. doi:10.1093/bioinformatics/btu523
- Uddin I, Woolston A, Peacock T, Joshi K, Ismail M, Ronel T, Husovsky C, Chain B. 2019. Quantitative analysis of the T cell receptor repertoire. *Methods Enzymol* **629**:465–492. doi:10.1016/bs.mie.2019.05.054
- Venturi V, Kedzierska K, Tanaka MM, Turner SJ, Doherty PC, Davenport MP. 2008. Method for assessing the similarity between subsets of the T cell receptor repertoire. *J Immunol Methods* **329**:67–80. doi:10.1016/j.jim.2007.09.016
- Wang C, Sanders CM, Yang Q, Schroeder HW, Wang E, Babrzadeh F, Gharizadeh B, Myers RM, Hudson JR, Davis RW, Han J. 2010. High throughput sequencing reveals a complex pattern of dynamic interrelationships among human T cell subsets. *Proc Natl Acad Sci* **107**:1518–1523. doi:10.1073/pnas.0913939107
- Wickham H. 2009. *Ggplot2: Elegant Graphics for Data Analysis*. New York: Springer.
- Wyss L, Stadinski BD, King CG, Schallenberg S, McCarthy NI, Lee JY, Kretschmer K, Terracciano LM, Anderson G, Surh CD, Huseby ES, Palmer E. 2016. Affinity for self antigen selects Treg cells with distinct functional properties. *Nat Immunol* **17**:1093–1101. doi:10.1038/ni.3522
- Zhou X, Ramachandran S, Mann M, Popkin DL. 2012. Role of lymphocytic choriomeningitis virus (LCMV) in understanding viral immunology: Past, present and future. *Viruses* **4**:2650–2669. doi:10.3390/v4112650

## Supplementary

|              |         | UMI count |        |        |        |        |        | Cells number |         |         |         |         |        |        |
|--------------|---------|-----------|--------|--------|--------|--------|--------|--------------|---------|---------|---------|---------|--------|--------|
|              |         | Young     |        |        | Adult  |        |        | Young        |         |         | Adult   |         |        |        |
| Name         | Chain   | M1        | M2     | M3     | M1     | M2     | M3     | M1           | M2      | M3      | M1      | M2      | M3     |        |
| CD4+ CM BM   | α chain | 976       | 1016   | 3945   | 784    | 22286  | 393    | 6392         | 6000    | 13000   | 8000    | 10000   | 4000   |        |
| CD4+ CM SP   |         | 60059     | 4111   | 69447  | 34621  | 4656   | 7712   | 134768       | 46000   | 88945   | 205000  | 114000  | 51000  |        |
| CD4+ E BM    |         | 12894     | 10729  | 45322  | 10784  | 1354   | 6925   | 66680        | 67000   | 161000  | 70000   | 100000  | 82000  |        |
| CD4+ E SP    |         | 184150    | 68984  | 405212 | 186485 | 161144 | 130397 | 583650       | 226000  | 543631  | 1000000 | 718000  | 650000 |        |
| CD4+ N BM    |         | 4421      | 4101   | 11624  |        |        |        | 26551        | 31000   | 39000   |         |         |        |        |
| CD4+ N SP    |         | 500932    | 241425 | 492564 | 10221  | 9064   | 1711   | 1000000      | 1000000 | 1070000 | 50000   | 58000   | 40000  |        |
| CD4+ Treg BM |         | 21757     | 7747   | 64357  | 15070  | 9473   | 16730  | 73716        | 99000   | 215000  | 70000   | 50000   | 70000  |        |
| CD4+ Treg SP |         | 361137    | 164556 | 273854 | 52590  | 54401  | 19406  | 744389       | 400000  | 506092  | 442000  | 162000  | 285000 |        |
| CD8+ CM BM   |         | 12778     | 9895   | 21679  | 7094   | 22467  | 19149  | 28340        | 36000   | 44000   | 47000   | 77000   | 110000 |        |
| CD8+ CM SP   |         | 99513     | 51772  | 159812 | 36879  | 17795  | 40745  | 173090       | 135000  | 178000  | 215000  | 48000   | 160000 |        |
| CD8+ E BM    |         | 7365      | 597    | 3620   | 1684   | 12829  | 81516  | 13667        | 9700    | 22000   | 110000  | 51000   | 800000 |        |
| CD8+ E SP    |         | 10599     | 3609   | 22482  | 15442  | 68036  | 11924  | 33298        | 31000   | 47000   | 120000  | 216000  | 105000 |        |
| CD8+ N BM    |         | 13874     | 4684   | 60752  |        |        |        | 45376        | 112000  | 148000  |         |         |        |        |
| CD8+ N SP    |         | 192821    | 464157 | 596538 | 36490  | 11830  | 18848  | 1000000      | 1200000 | 1200000 | 219000  | 49000   | 73000  |        |
| CD4+ CM BM   |         | β chain   | 1337   | 980    | 2666   | 885    | 1834   | 539          | 6392    | 6000    | 13000   | 8000    | 10000  | 4000   |
| CD4+ CM SP   |         |           | 62857  | 3235   | 60734  | 48330  | 5172   | 8143         | 134768  | 46000   | 88945   | 205000  | 114000 | 51000  |
| CD4+ E BM    |         |           | 32517  | 25937  | 47924  | 14497  | 41405  | 9936         | 66680   | 67000   | 161000  | 70000   | 100000 | 82000  |
| CD4+ E SP    |         |           | 219390 | 85408  | 315338 | 263168 | 174077 | 101827       | 583650  | 226000  | 543631  | 1000000 | 718000 | 650000 |
| CD4+ N BM    | 4700    |           | 5024   | 13424  |        |        |        | 26551        | 31000   | 39000   |         |         |        |        |
| CD4+ N SP    | 642033  |           | 197314 | 415101 | 16344  | 11544  | 2364   | 1000000      | 1000000 | 1070000 | 50000   | 58000   | 40000  |        |
| CD4+ Treg BM | 19707   |           | 8123   | 60971  | 14335  | 14906  | 12208  | 73716        | 99000   | 215000  | 70000   | 50000   | 70000  |        |
| CD4+ Treg SP | 455374  |           | 199681 | 234393 | 157530 | 48780  | 21502  | 744389       | 400000  | 506092  | 442000  | 162000  | 285000 |        |
| CD8+ CM BM   | 13442   |           | 9438   | 19861  | 9031   | 34436  | 14826  | 28340        | 36000   | 44000   | 47000   | 77000   | 110000 |        |
| CD8+ CM SP   | 104644  |           | 56797  | 145804 | 38910  | 19600  | 61581  | 173090       | 135000  | 178000  | 215000  | 48000   | 160000 |        |
| CD8+ E BM    | 5229    |           | 929    | 3945   | 2414   | 18903  | 132048 | 13667        | 9700    | 22000   | 110000  | 51000   | 800000 |        |
| CD8+ E SP    | 11077   |           | 3636   | 15769  | 23605  | 90234  | 14581  | 33298        | 31000   | 47000   | 120000  | 216000  | 105000 |        |
| CD8+ N BM    | 16392   |           | 6490   | 55300  |        |        |        | 45376        | 112000  | 148000  |         |         |        |        |
| CD8+ N SP    | 231312  |           | 487456 | 515372 | 53474  | 17830  | 14301  | 1000000      | 1200000 | 1200000 | 219000  | 49000   | 73000  |        |

**SI Table 1:** UMI count and the cells number of each compartment in young or adult mice. Compartments names are naïve, effector, central memory and Treg (N,E,CM,Treg). The tissues are bone marrow (BM) and spleen (SP). The numbers are extracted after running the TCR sequencing.

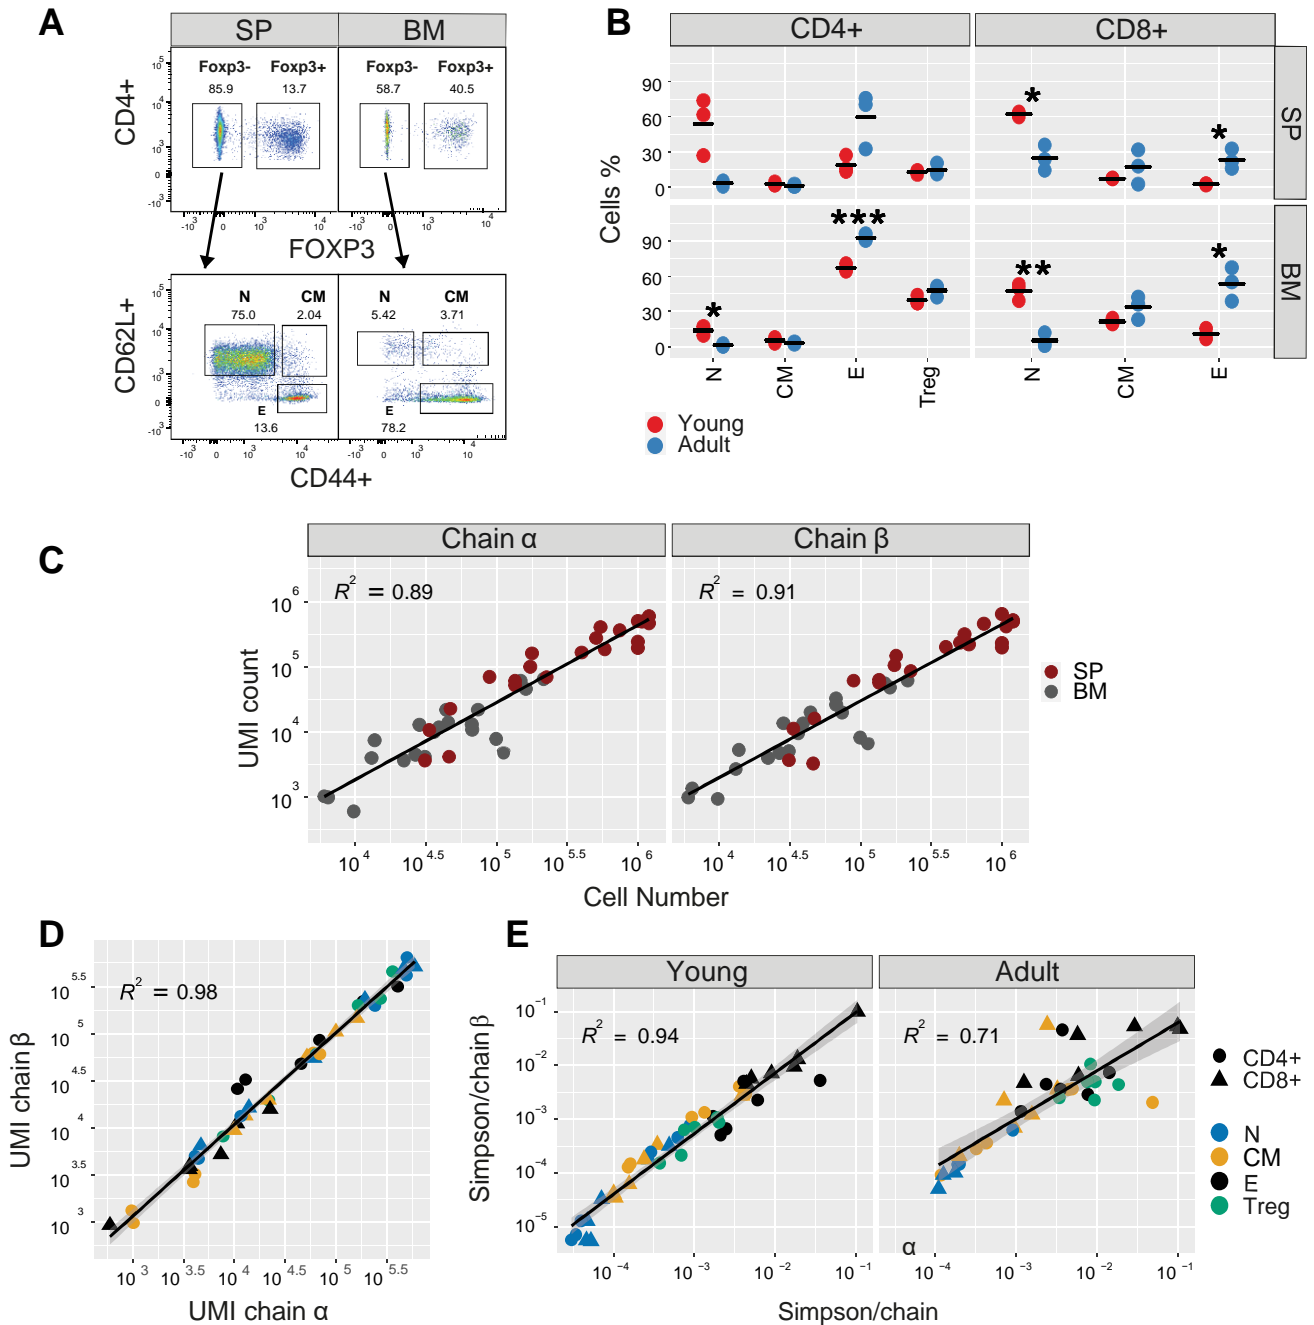



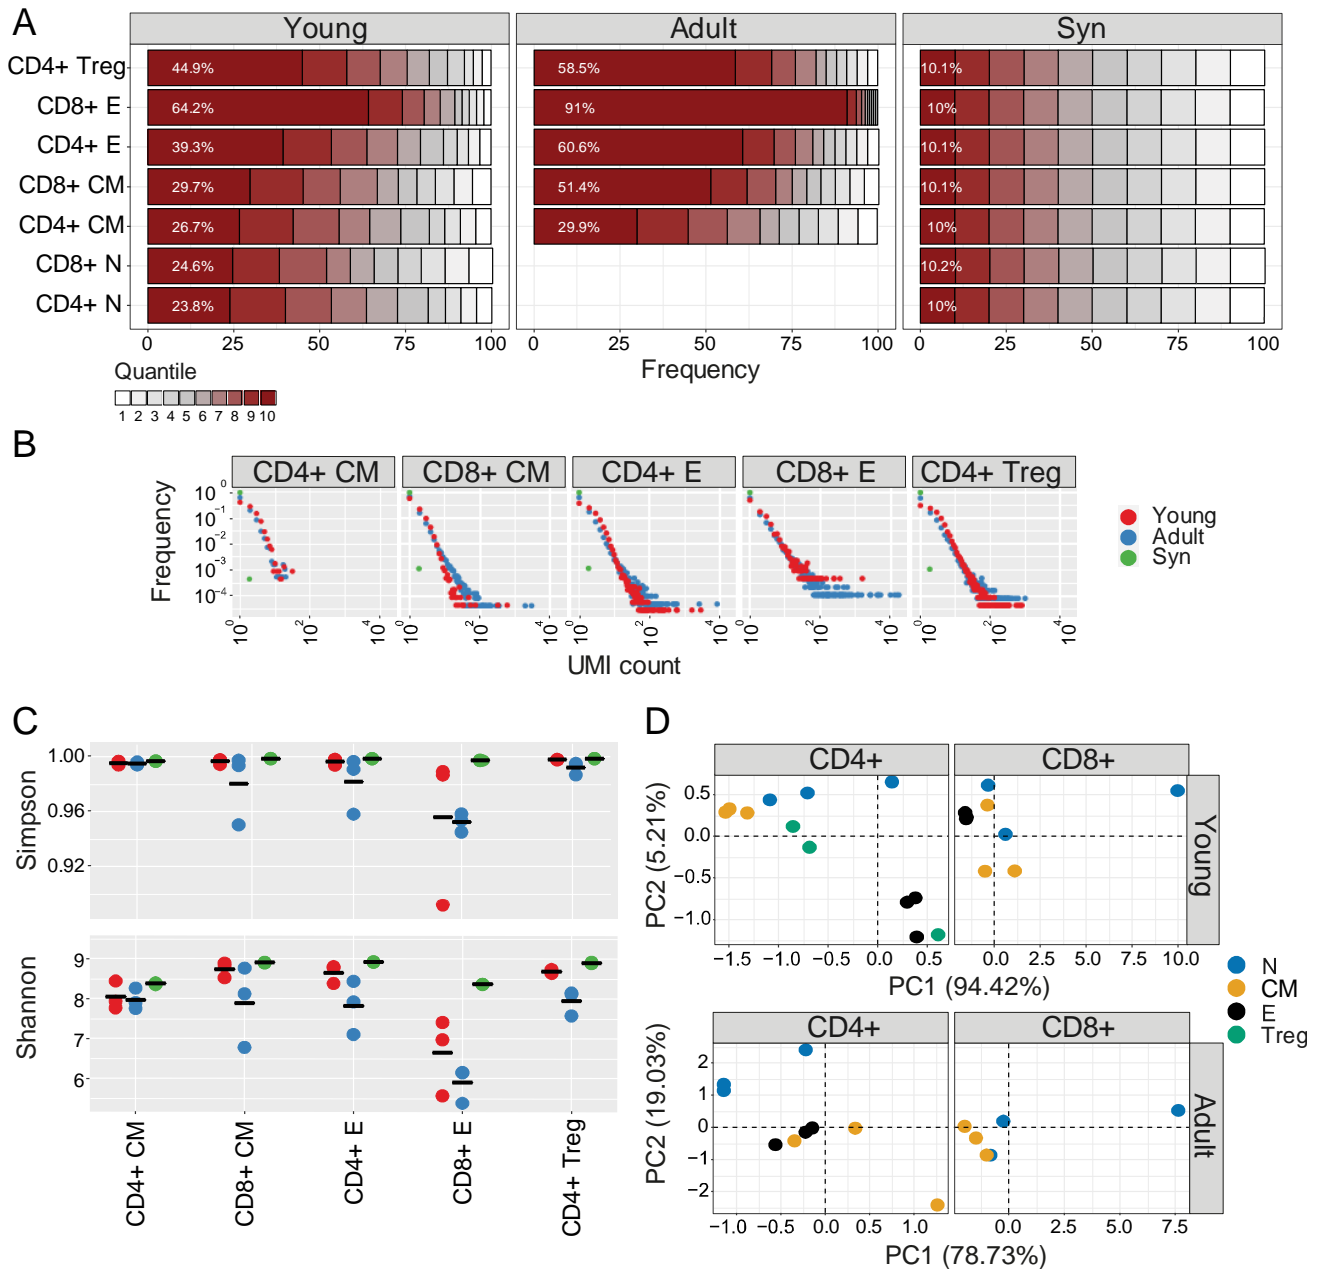

**SI Figure 2: Clonal expansion and diversity of the TCR $\beta$  repertoire in different bone marrow subsets of young and adult mice.** (A) The TCRs in each repertoire were ranked according to frequency. The proportion within each decile is illustrated (low abundance sequences in white, ranging to high abundance sequences in dark red). The percentage of the distribution represented by the top decile is shown in white text. (B) The sequence abundance distribution in each compartment. The plots show the proportion of the repertoire (y-axis) made up of TCR sequences observed once, twice, etc. (x-axis). Repertoires from young mice are shown with red dots, older mice with blue dots, and synthetic repertoires in green. (C) Simpson and Shannon scores of equal repertoires size (500 CDR3NT's) from each compartment and mouse. Colors same as panel B. Mean is shown in black lines (n=3). (D) PCA of the Renyi diversities of order 0, 0.25, 0.5, 1, 2. CD4+ or CD8+ T cells compartments (color dots) from young or adult (left or right panel respectively).

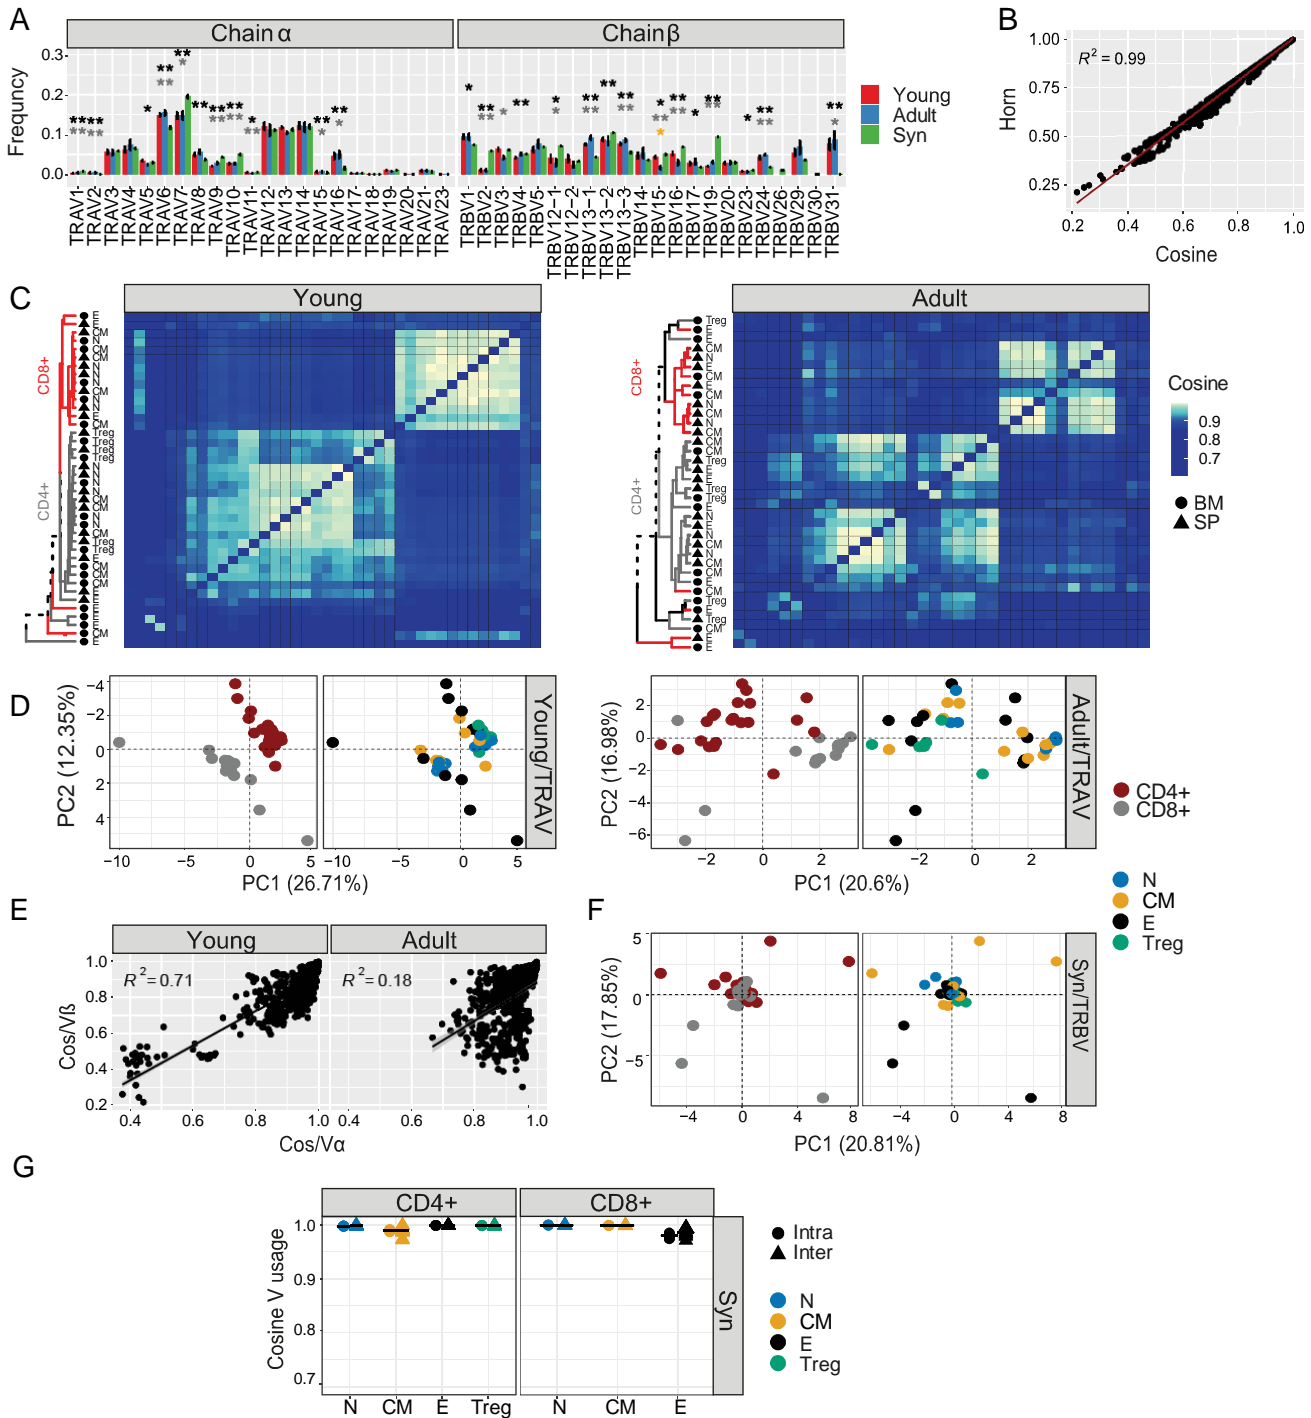

**SI Figure 3:** (A) TRV usage of naïve cells from young (red), adult (blue), and synthetic (green) mice. Each bar represents the mean frequency of the V segment in grouped naïve T cells from both tissues. Error bars are SEM ( $n=6$ , three mice from CD4+ and CD8+ naïve). Significant differences between all pair groups (Young vs Adult= orange, Young vs Syn=black, Adult vs Syn=grey) in specific segments are detected both in TRBV genes and TRAV families of genes (P-values: \*  $< 0.05$ , \*\*  $< 0.01$ , t-test with Benjamini & Hochberg correction). (B) A high correlation between Cosine and Horn similarity measurements was calculated for the TRBV usage. Each point is the Horn or Cosine score for the V $\beta$  usage between all pair compartments. (C) The cosine similarity index of the TRAV usage was calculated between all pairs of repertoires in young (left) or adult (right) mice. Hierarchical clustering dendrograms show the organization of the assigned at each plot, colored by CD4+ and CD8+ groups (grey and red branches respectively) and labels by compartment (text and symbol). Tissues are marked in symbols shape (SP= triangles, BM= circles). (D) PCA separates the V $\alpha$  usage between CD4+ and CD8+ class of young (upper) or adult (lower) mice but not within their subgroup compartments. Each color represents one compartment from one mouse (e.g., CD8+ Effectors, BM, mouse 1). (E) Pairwise cosine similarities between V $\alpha$  and V $\beta$  usage show low correlation, especially in adult mice. Each point is the cosine similarity for V $\alpha$  and the V $\beta$  usage. (F-G) Uniform V $\beta$  usage in synthetic TCRs, both in PCA analysis (F) and in pairwise cosine similarity scores (G).

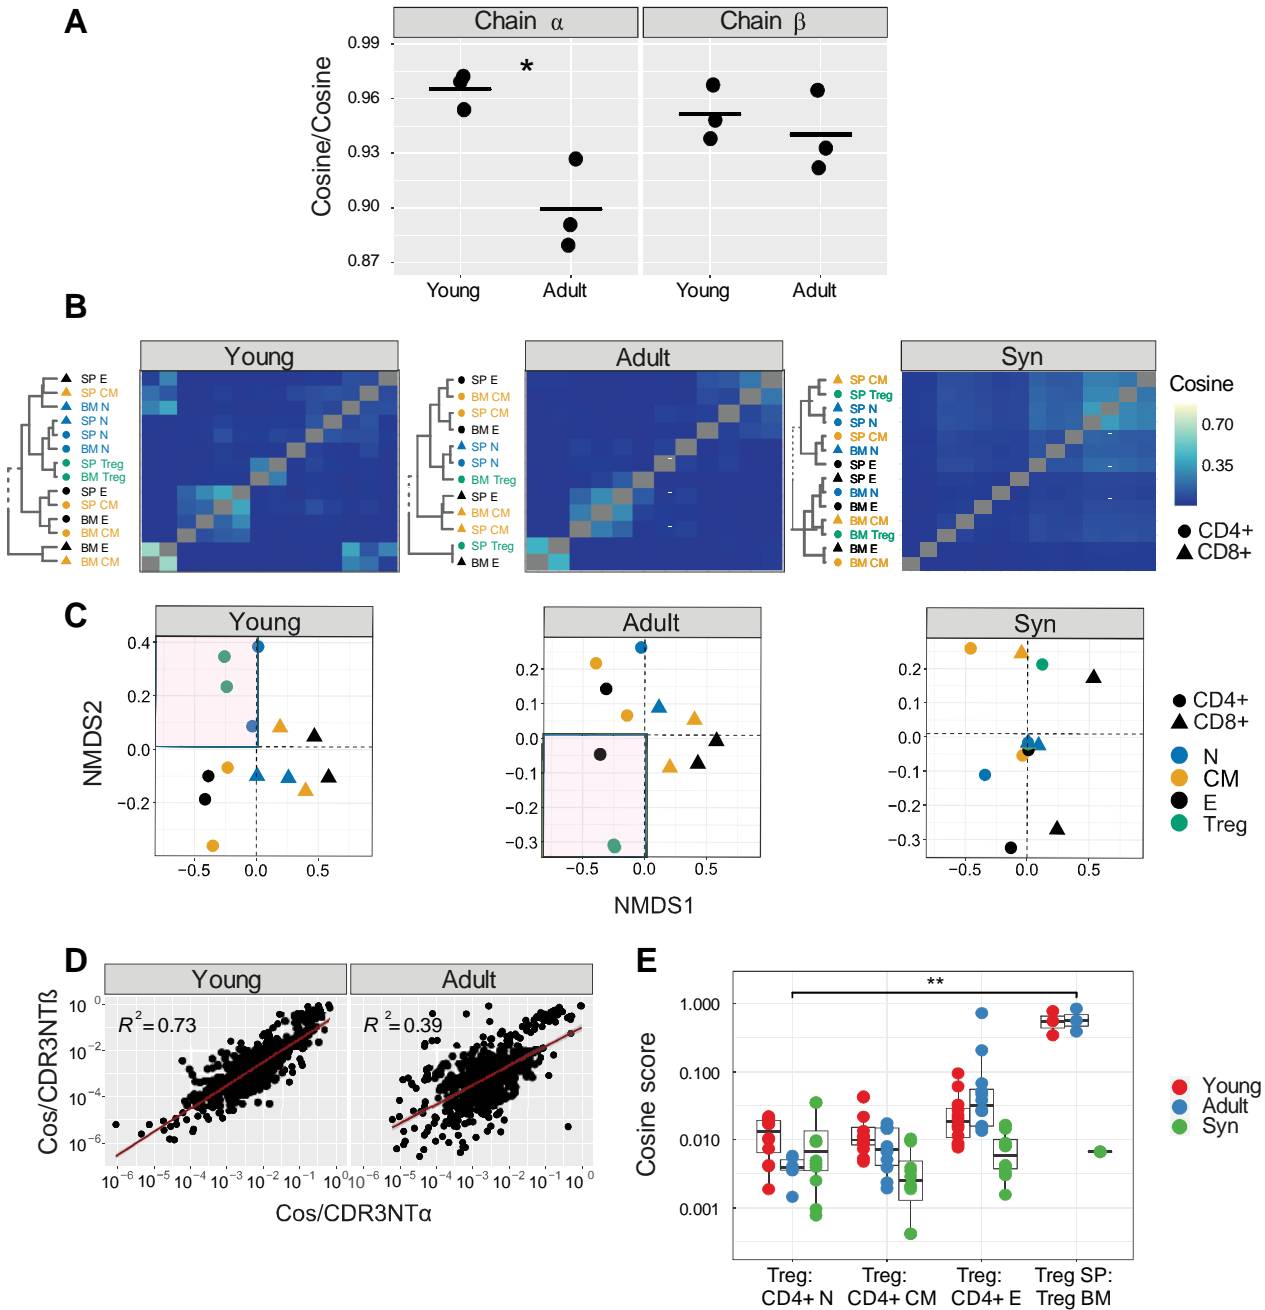

**SI Figure 4: Differential sharing of T cell CDR3 nucleotide  $\alpha$  and  $\beta$  chain sequences defines different subpopulations of T cells.** (A) Similar CDR3NT  $\alpha$  and  $\beta$  Cosine scores across young and adult mice. Cosine measurement calculated for CDR3NT between all pair compartments within each young or adult mouse (for example, in young mouse 1: Treg SP and CD4+ N BM). These values were compared across mice using another Cosine score calculation. The dots color corresponds to the TCR chain (red=TCR $\alpha$ , grey=TCR $\beta$ ). Significant differences between age groups are denoted in asterisks (P-values: \* < 0.05, \*\* < 0.01, t-test). (B) Pairwise cosine similarity from representative young, adult, or synthetic ("Syn") mouse CDR3 $\alpha$ NT sequences. Correlation levels are represented by color (high=light blue, low= dark blue). In color and text, hierarchical clustering dendrograms for all T cell compartments are plotted to the left of each heat map (CD4+=circle, CD8+= triangles). (C) The similarity matrices shown as heatmaps in B are represented in two dimensions by NMDS. (D) CDR3 $\alpha$ NT vs. CDR3 $\beta$ NT pairwise cosine similarities between all pairwise compartments of young and adult mice. (E) Cosine index sharing levels between CDR3 $\beta$ NT of Tregs across tissues or naïve and CD4+ effector repertoires within each young (red), adult (blue) or synthetic-based (green) mouse. Comparisons between the different tissues (SP-SP, SP-BM, BM-BM, n= 9). Mean is shown by horizontal black lines. Significant differences are denoted in asterisks (P-values: \* < 0.05, \*\* < 0.01, T-test) and calculated between the groups: Tregs across tissues and Treg CD4+ naïve cells.

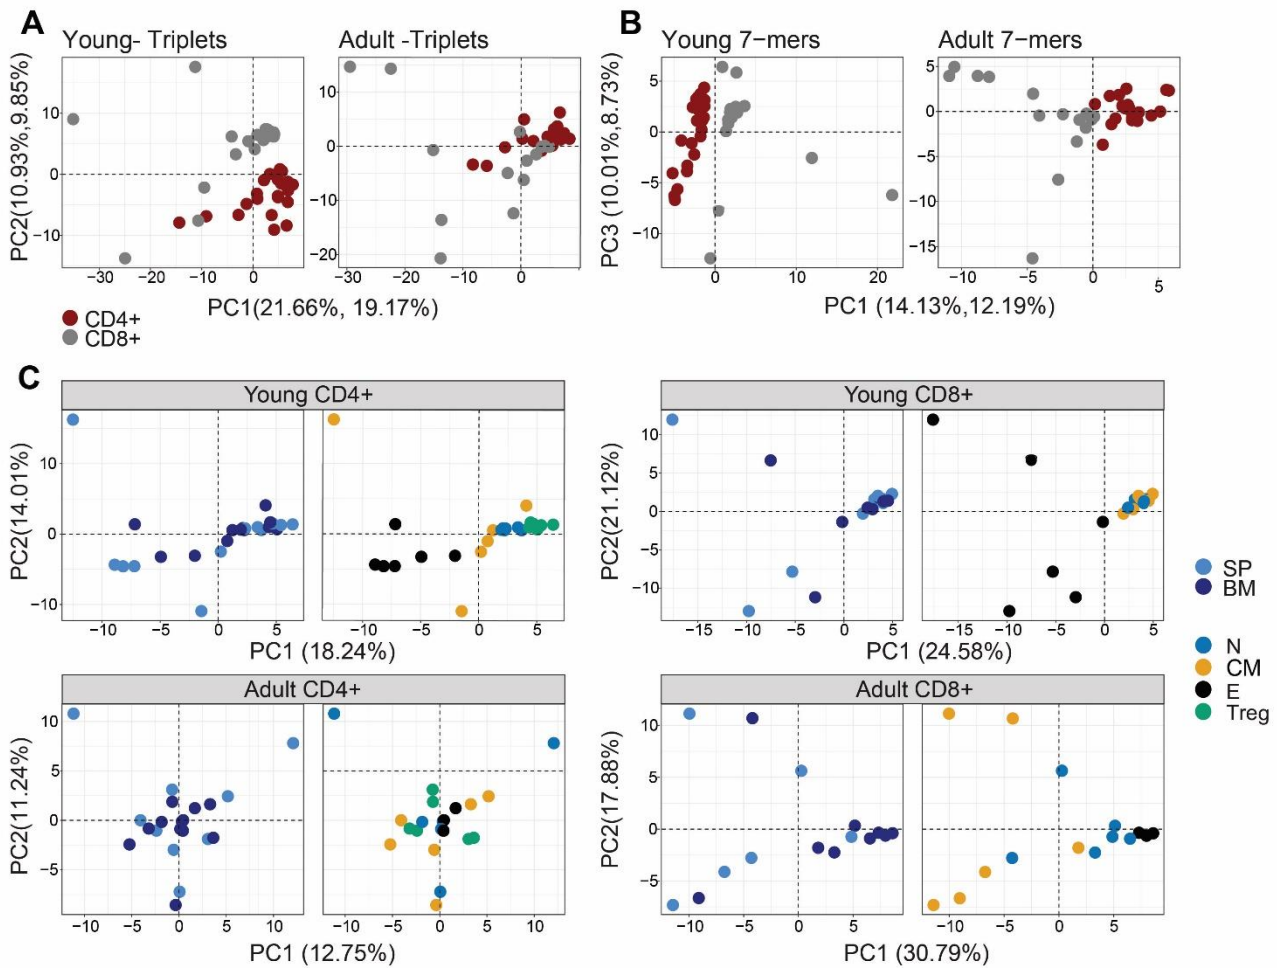

**SI Figure 5: CD4+ T cells compartments distinct top CDR3 $\beta$ AA motifs, alter with age.** Top triplets and 7-mers are selected by the mean frequency of each motif across all compartments and mice (A-B) PCA analysis of the top CDR3AA $\beta$  triplets (A), and 7-mers (B) motifs separate between CD4+ and CD8+ class (red and grey dots, respectively) in young (left) and adult (right) mice. (C) CDR3 $\beta$ AA 7-mers PCA analysis of CD4+ (left) or CD8+ (right) from young (upper) or adult (lower) mice. See legend for symbols and color code.

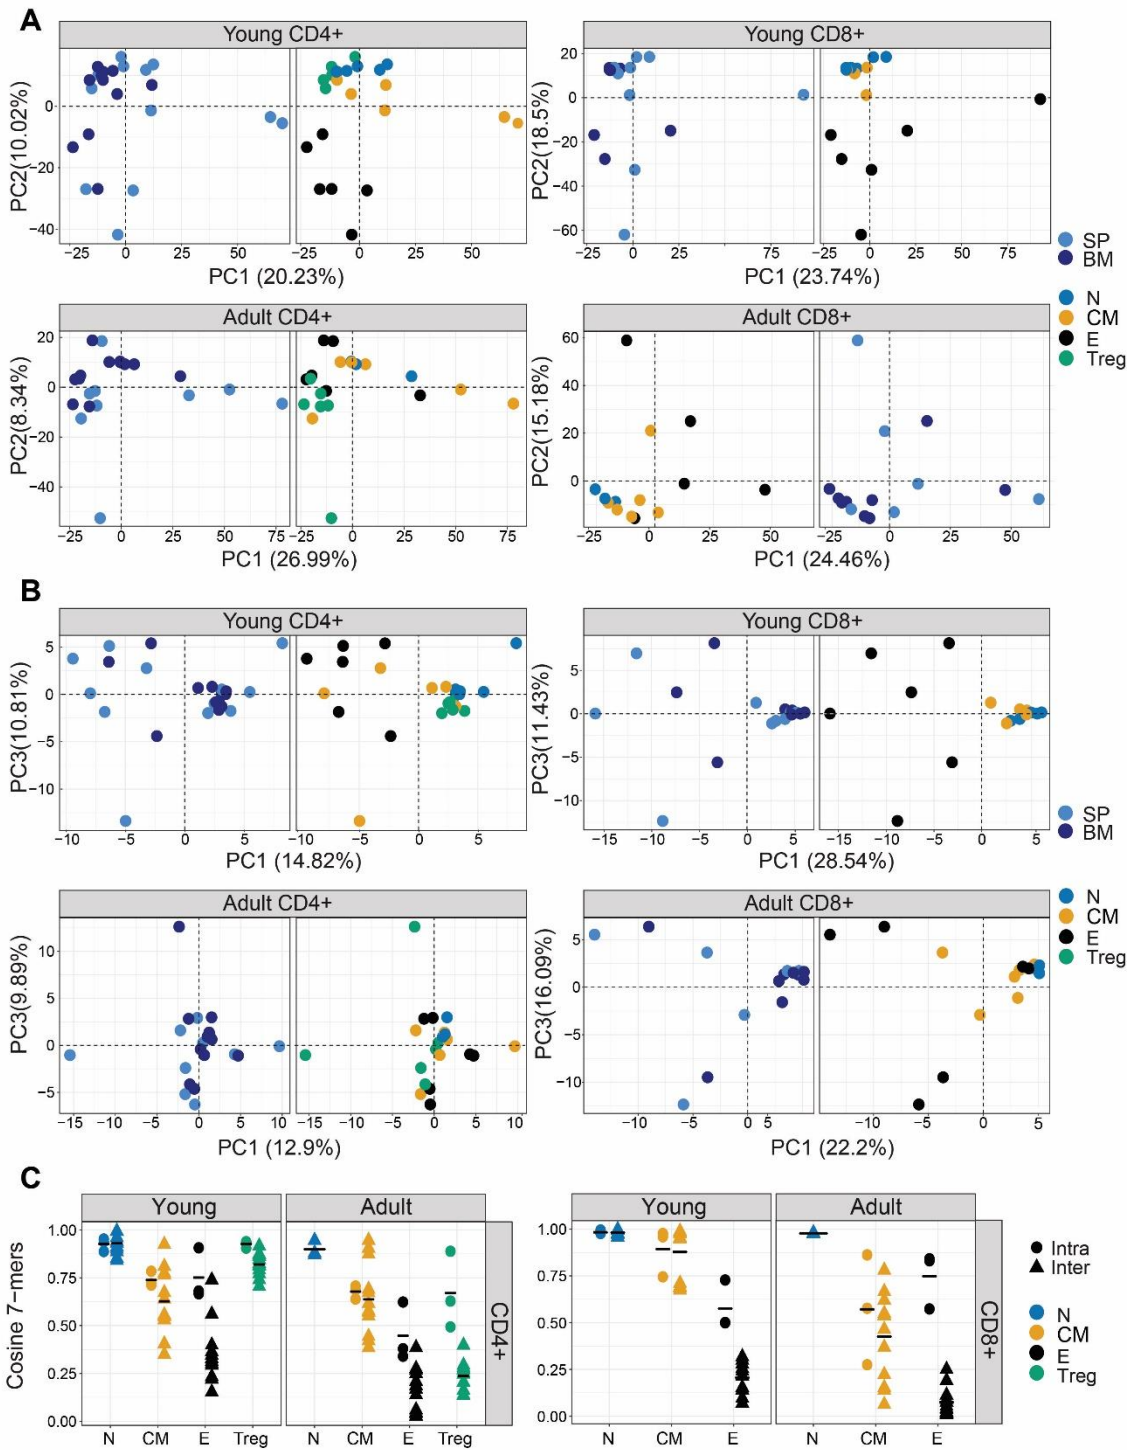

**SI Figure 6:** PCA analysis of the top CDR3 $\alpha$ AA motifs separates between CD4+ compartments of young mice, yet in a slightly lower degree than the CDR3 $\beta$ AA motifs. (A-B) PCA analysis of the top CDR3 $\alpha$ AA triplets (A) or 7-mers motifs (B). CD4+ or CD8+ compartments (left and right, respectively) in young or adult mice (upper and lower, respectively) are assigned in color dots. (C) Pairwise cosine similarities scores of the top 7-mers CDR3 $\beta$ AA motifs between individuals (circles) or within individuals (between spleen and bone marrow, triangles). T cells compartments (colored dots) are divided into CD4+ (left) and CD8+ (right) from young or adult mice. Mean is shown by horizontal black lines.

**A**

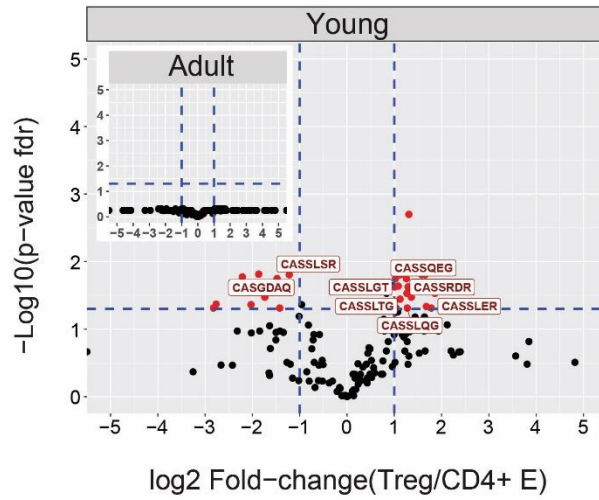

**B**

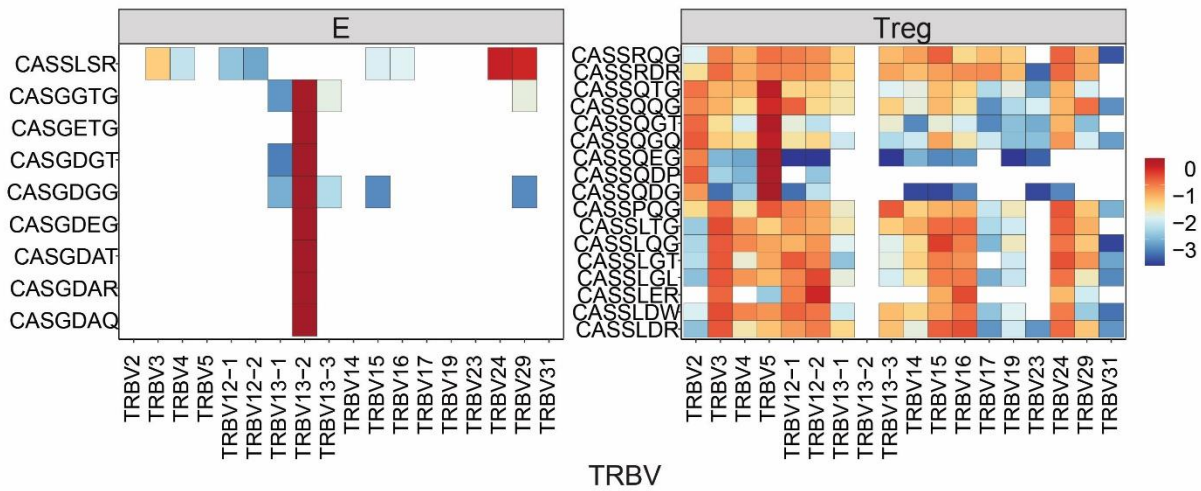

**SI Figure 7:** CD4<sup>+</sup> T cell compartments express distinct 7-mers  $\beta$  chain motifs in young and not adult mice. (A) Treg and CD4<sup>+</sup> effector differentially expressed 7-mers are found in young but not adult mice. Each dot represents a single 7-mer motif. P-value (t-test) was calculated for each motif across six samples (three mice and two tissues) of CD4<sup>+</sup> Treg and CD4<sup>+</sup> effector cells. The Y-axis shows FDR-adjusted p-values. The X-axis shows the log 2-fold-change, calculated between Treg and CD4<sup>+</sup> effector mean motifs frequency across compartments (6 samples each). Significance thresholds are marked in blue lines: (1) at  $y=1.3$  (equivalent to a p-value of 0.05) and  $x=\pm 1$  (denoting a total fold-change of 2). Representative 7-mers above both thresholds are labeled with red text and dots. (B) The V $\beta$  usage of the CD4<sup>+</sup>Treg (right) and CD4<sup>+</sup> effector (left) differentially expressed 7-mers. The color represents the  $\log_{10}$  frequency of each 7-mer in a specific V $\beta$  gene (low= blue, high=red).
